# Supplementary material for: Distinct patterns of transcriptional and epigenetic alterations characterize acute and chronic kidney injury
Source: PubMed Central journal article supplement (PMC6294783; doi:10.1038/s41598-018-35943-x), 2018-12-14
Supplement: 41598_2018_35943_MOESM1_ESM.pdf [file 41598_2018_35943_MOESM1_ESM.pdf]

SREP-17-56516A

Supplementary information

**Distinct patterns of transcriptional and epigenetic alterations characterize acute and chronic kidney injury**

<sup>1\*</sup>Roya Sharifian, <sup>2\*</sup>Daryl M. Okamura, <sup>1</sup>Oleg Denisenko, <sup>4</sup>Richard A. Zager, <sup>4</sup>Ali Johnson, <sup>1,3</sup>Sina A. Gharib,

and

<sup>1</sup>Karol Bomsztyk,

<sup>1</sup>UW Medicine Lake Union, <sup>3</sup>Computational Medicine Core, Center for Lung Biology, University of Washington, Seattle, WA 98109, USA. <sup>2</sup>Seattle Children's Research Institute, Center for Developmental Biology & Regenerative Medicine, University of Washington, Seattle, WA 98105, USA. <sup>4</sup>the Fred Hutchinson Cancer Research Center Seattle, WA 98109, USA.

\*These authors contributed equally to this work

Address for correspondence:

Karol Bomsztyk

UW Medicine at Lake Union

Box 358050

University of Washington,

Seattle, WA 98109 USA

Tel. (206) 616-7949

Fax. (206) 616-8591

e-mail: [karolb@u.washington.edu](mailto:karolb@u.washington.edu)

**Table S1. PCR primers RT-qPCR**

| Primer  | Entrez ID | FWD Sequence          | REV Sequence          | Primer  | Entrez ID | FWD Sequence          | REV Sequence          |
|---------|-----------|-----------------------|-----------------------|---------|-----------|-----------------------|-----------------------|
| Acta2   | 11475     | GACTCTCACACGTCACTACT  | AACTGCATTTTTGGGGACAC  | Kdm6b   | 216850    | ACTTCTTGGACCAGTACCC   | TTCAGTCCCACTCTTCCC    |
| ActB    | 11461     | TCTCAGCTGTGGTGGTGAAG  | GTCCCTGTATGCCTCTGGTC  | Kdr     | 16542     | CGCTCACCTCTGTTAAATG   | CACCTCTCTCGTATTCCA    |
| Actc1   | 11464     | ACCGCAAGTCTTCTGAGAT   | GTTGCAAGTCTGGTCTGGT   | Kim1    | 171283    | TTGCCTCCGTGTCTCTAAG   | AGATGTTGTCTTCACTCGG   |
| Actn4   | 60595     | CTTCTCCACAGCCCTCTATG  | CAAGGGAGTCTCTGTTCAAG  | Klf2    | 16598     | TGACTTATTTCCCTCGGGTC  | ACGTTGGGGACAGTAAACTC  |
| Agt     | 11606     | GCGCTGACCGAGAATAAATG  | GTCACCCAGTATCCAAACA   | Klf4    | 16600     | AGGAAGCGATTCAAGTACAG  | CCCCGTTTGGTACCTTGA    |
| Srp14   | 20813     | GCCTTTAATCCAGCACTTG   | CTCTGTGTAGCCCTGGCTGT  | Klotho  | 16591     | TTTGTCATGGTGGTAGAGG   | TCAGATACCATTACCCCTGC  |
| Angpt1  | 11600     | AGTTGGAACAGCCCAATTGTA | TGAAGGCCTACGAACACTTT  | Kmt1b   | 64707     | ACTTCTGGGGATTAGATGCG  | TTAGAACTCCAGACCCAGA   |
| Angpt2  | 11601     | AAGAATGTTCCGTGGGAGTT  | TGCTTAGAGGAATGTGGTCC  | Kmt1c   | 110147    | CATCAACACCTGAGGACTCT  | TTACTGGGGTCTGTAGTGA   |
| Aoc1    | 76507     | CAACGGTCTCAACCATGTTC  | GGCTTGTAGGTCCTCATGTA  | L1l2    | 14573     | CCCAAAACATCAGGAAATC   | TGTTTCATGGGCATCTTTCT  |
| Apoe    | 11816     | GAACAGACCAGCAAAATACG  | TCTTCCACTATTGGCTCGAA  | L32     | 19951     | TTAAGCGAAACTGGCGGAAAC | TTGTTGCTCCATAACCGATG  |
| Arg1    | 11846     | TACCAGAAAGGAAGTCTGGG  | CACATGAAAACCATCTGGGG  | Lama1   | 16772     | AGTCCTTGGACCTGAGCCGA  | GCTGGCGACAGTTTAGGGCT  |
| Axin2   | 12006     | GGCCTGTGTATAGTGTAGGG  | CAGGTACTGTCTGATTCCC   | Lama2   | 16773     | CTGAGGGGTGTCAACCTGT   | CTGACACCGTGCAAAAGAA   |
| Bax     | 12028     | CATGGCAGACAGTACCATC   | GAAAAATGCCTTTCCCTTC   | Lama3   | 16774     | AGAAGTCACCTTTGGGAGCA  | GATTGGGGGAAAAAGCTCTC  |
| Bcl2l1  | 12048     | GCTGTGTCCAGAGACTGAC   | GCCCTCAGAAGCCAGAACC   | Lama5   | 16776     | GAGGATGCTTGAGGAAGCTG  | AAGGTCTGGGAACCTCAAT   |
| Bmp7    | 12162     | GTCTCAGGAAGAGCTAGTGG  | TCGACGACAGCTCTAATGTC  | Lamb1   | 16777     | AGAATTGGTGCAGTGGAAAG  | TAGTAGTACTGCCTCGGTTTG |
| Clu     | 12759     | ACCCCTAGAGAACTCCACAT  | TGCAGGCATTAGTGTACAGA  | Lamb2   | 16779     | GGAGGGCACATATGAGGAGA  | GACGATGCTGTGAGAACAG   |
| Col11a1 | 12814     | ACTGCTTTAATCCACCCCA   | TGGCATTACTGAAGCACTCT  | Lamb3   | 16780     | GGGCGAGTGTCTACTATGC   | ACAGGCTCAGTGGGAACAGT  |
| Col13a1 | 12817     | ATGCCTCTAACCTGGGACT   | TGGGCATTTTCAAAGGTGAA  | Lamc1   | 226519    | GGAACTTCCCACACGGGTC   | CGGTGCTGATGCCCTCAAGT  |
| Cox2    | 19225     | TGCTTCCACTCCAGACTAGA  | CAGCTCAGTTGAACGCCTTTT | Lamc2   | 16782     | TGGCAGTGTGGATGAAGAAG  | GGCAGGTTGTCTCGAATGTT  |
| Cst3    | 13010     | AAGGGCTGAGTCTAGAAGGA  | CCTTCTGCGAGATGAAACAC  | Lamc3   | 23928     | AGATCAAGCAGTGCCAGAT   | AGATCAAGCAGTGCCAGAT   |
| Ctgf    | 14219     | TGCTGTGCAGGTGATAAAGC  | CCACCCAAACCAAGTATAA   | Ldlr    | 16835     | GTCCTGTGTGGAGGAAGT    | CAGGCTGACCATCTGCTTGG  |
| Ctnnb1  | 12387     | GATGGACCCTATGATGGAGC  | CAGCCCATCAACTGGATAGT  | Lrp5    | 16973     | CTACCTGGACTTGAATTCGGA | TGCAGATAGTACTGGCTGT   |
| Cubn    | 65969     | TGCTTCATCAAATCGGGTCT  | CCGATTCACTACTCCACAT   | L-FABP  | 14080     | CAAGCTGGAAGGTGACAATAA | GTGTCTCCATTGAGTTCACTC |
| Cxcl1   | 14825     | TGCATCTGGATAGGGAAGG   | ATCAGGCAATGAACAGAGG   | Mbd3    | 17192     | TGGACTTGAACCTACTTGT   | TCACTGCTCATCTGCTTTCA  |
| Cypa    | 268373    | GTGGTCTTTGGGAAGGTGAA  | TTACAGAGCATTGCGAGCAG  | Mcp1    | 20296     | TTGAATGTGAAGTTGACCCG  | TTAAGGCATCACAGTCCGAG  |
| Dvl1    | 13542     | CACACAGTACCAAGTGGGTC  | CCTGACTTCGAGGGCTACTG  | Mkp1    | 19252     | CAGTGTCTGCAGTTGAGTC   | GGTGATGGGGCTTTTAAAGT  |
| Edn1    | 13614     | GCATCAAGGCATCTTTTCGT  | GTAGTCAATGTGCTCGGTTG  | Muc1    | 17829     | CAACTACGTAAGCCTGGTGA  | CTGAGAGCCACCACTACTG   |
| Egf     | 13645     | ACTGGGAGTAGACAGAAGGT  | AGTGATTAGCCGTGGAAACT  | Myc     | 17869     | ACATCTGTCCATTCAAGCA   | AACTGTTCTCGTCTTCTCT   |
| Egfr    | 13649     | CTGCCGTGTCAAAGAAGAC   | TGCGTCATCTATGTTGCTCT  | Neph1   | 170643    | CCTATGACCTTCGCTGGCCT  | AGGCTCCCAGCATCCATGT   |
| Egr1    | 13653     | AACAGCCCTTCACTTACCA   | CTTGGACATGGCTGTTTTCAG | Netrin1 | 18208     | CCCTTGTCTTACCAATTTGGG | CACATACCTTGTGCCACTG   |
| Epo     | 13856     | AATTGATGTCCGCTCCAGAT  | AGAGCTTGCAAGAAATATCCA | Ngal    | 16819     | AGATGCTCCTGGTATGGTG   | CTGTCTGCCACTCCATCTTT  |
| Ezh2    | 14056     | TGAAGTATGTGGGCATCGAA  | GAAGTAAAGGCAGCTGTTTC  | Nos3    | 18127     | ACCCAAACCTTGTGAGTTAC  | CTGGGACTCACTGTCAAAGA  |
| Fasn    | 14104     | CCCTGGTGTCTCCTCAGT    | CGACGCCCTCATCTCTGT    | Nphs2   | 170484    | GCTTAGGTGCTCCTGGATGA  | GACTCAGTCTGCCCTCTG    |
| Fgf10   | 14165     | GCCACCAACTGCTTCTTCTC  | CTGACCTTGGCCGTTCTTCTC | Oct4    | 18999     | CACCACACTTACTCAGTCC   | CTGGTGCCTCAGTTTGAATG  |
| Flt1    | 14254     | GACATGGGAAGACAGGGTAG  | AGCCATTTTAGAGACCCAGG  | p21     | 12575     | GAAAACGGAGGCAGACCA    | TGACCACAGCAGAAGAGG    |
| Fn1     | 14268     | GCCAAACGCTTACTACTGTG  | TGACGTCCACATCATGGAAT  | p53     | 22059     | CTCTGAGTAGTGGTTCTGG   | TGGCTGGATAGAATTCGCT   |
| Foxo1   | 56458     | GTCTCCCGTACTTCTCTGCT  | GTGGTCCAGTTGGACTGGTT  | Pai1    | 18787     | TGAGAGAGGGCAAAGTGGTT  | ATACAGCAGCCGAAATGAC   |
| Fsp1    | 20198     | GGAGGCCCTGGATGTAATTGT | TGTCACCTCTTTGCCTGAGT  | Pdgfrb  | 18591     | CCTCTGATCTTTTGGGGTTC  | CTCCCCACTTCCAATCTAC   |
|         |           |                       |                       | Pdgfrb  | 18596     | TTTTCACTCAGAGCCACCT   | ATTCATTAAGCATGGCTGGC  |

|        |        |                       |                        |        |        |                                 |                        |
|--------|--------|-----------------------|------------------------|--------|--------|---------------------------------|------------------------|
| Fyn    | 14360  | GGGGTTGTACACGTCCCAT   | CTGGAGCACTCTGACACGG    | Pecam1 | 18613  | TGCCTTGTCATGTTGGGTA             | TCTCTGGAACTCCTTTCA     |
| Fzd1   | 14362  | GAGAGAGACAAACACGACCT  | ACAAGATGGGATGCAGTAGG   | Pnmt   | 18948  | ATCTTACTAGCTTCCAGCGG            | CAATGAGGAGGAGATGACCC   |
| Gapdh  | 14433  | AACTTTGGCATTGTGGAAGG  | AGTGGATGCAGGGATGATGT   | Rage   | 11596  | GATGCAAAGGCAATCTCACTCTGCAT<br>C | CCTGGTATGGTGGGAGGCATAG |
| Grp    | 225642 | GTGGCAGAGCTCTGAGAAC   | ACCAGAGCCAACAGCAAGAG   | Sema3a | 20346  | GCGGTGGCTTATGTACTACT            | GGAAACAATTTACGACCTGGC  |
| Gsk3a  | 606496 | CCCCCTGGGTAAATAGAT    | GAGGACAAGAAGGGGTACAG   | Sox2   | 20674  | TTCTAGTGTACGTTAGGCG             | CCCGAGTCTGACTCTAAAT    |
| Hamp   | 84506  | GGATGTGGCTTAGGCTATG   | CTTCCCATCTGCATCTTCT    | Spp1   | 20750  | CATGAAGAGCGGTGAGTCTA            | TTGTTGCTCTGATCAGAGGG   |
| Hdac9  | 79221  | CCCTGCCAATCACTCTG     | CCCTGCCAATCACTCTG      | Tek    | 21687  | AGGAAGAAAAGCGAGGGAAA            | CCCTCTTCTGCTACTTGG     |
| Hif1a  | 15251  | CTGCGTGCATGTCTAATCTG  | CGCGGAAAACCTTGTTTCA    | Tgfb1  | 21803  | GCAGTGGCTGAACCAAGGA             | GCAGTGAGCGCTGAATCGA    |
| Hmgcr  | 15357  | TGTTCAAGGAGCATGCAAAG  | CTTACCTGTTGTGAACCATGTG | Timp1  | 21857  | TGCCAGACTAACTGCTCACG            | TTAAAGGCTTGTGGGTTTGG   |
| Hmgcs1 | 208715 | CAAGGTGAACCTCTCTCCACC | ACACCGGCATACTTCTCTG    | Timp2  | 21858  | AGAAACGGTTAAGGACTCCC            | TGTCCTCCCAGTCTGTCTTA   |
| Hmox   | 15368  | TCTTGCCTGGCTCTTCTC    | GGCTGCTGTTTTCAAAGTTC   | Timp3  | 21859  | CAATCAGTCAAAGGCAGCAA            | TCCTCTGACATGCACACAT    |
| Hpx    | 15458  | GGGCCAAATTTGACTGCTA   | CCAAGGATGCTGTTACCTT    | Tirap  | 117149 | ATATCCCCAGGGAGAGACAA            | TCAAGGTACATACCAGGGGA   |
| Icam1  | 15894  | CGAGGTTTTCTACTGGTC    | TGCCAGTCCACATAGTGTTT   | Tlr1   | 21897  | GGCAAACCTAAGAGCATCCA            | ATTGCTGTGTGAACACGTTT   |
| Ifng   | 15978  | GCTTTAACAGCAGGCCAGAC  | GGAAGCACCAGGTGTCAAGT   | Tlr2   | 24088  | TGCTTCTCTGCTGGAGATTT            | TGTAACGCAACAGCTTCAGG   |
| Igf1   | 16000  | TGCCTCTAAAGAGCCGAAAA  | GAGCTACGTGGGAAGAGGTG   | Tlr4   | 21898  | GCATGGCTTACACCACCTCT            | GTCTCCACAGCCACCAGATT   |
| Igfbp7 | 29817  | AATCCATGAGCCTCTGTAGC  | AAGAGAAGTGTGTCAAGCAA   | Tnf    | 21926  | CGCTACATCACTGAACCTCT            | TTCTCTCAATGACCCGTAGG   |
| Il10   | 16153  | CCAGGGAGATCCTTTGATGA  | AACTGGCCACAGTTTTTCAGG  | Vcam1  | 22329  | TGCAAGGAGTAACCAGAAA             | ATCATGGGACCATTCCAGTC   |
| Il18   | 16173  | GTGTTCCAGGACACAACAAG  | CTTCCTTTTGCAAGCAAGA    | Vegfa  | 22339  | GAGAGAGGCCAAGTCCTTT             | TTGGAACCGGCATCTTTATC   |
| Il6    | 16193  | GTGGCTAAGGACCAAGACCA  | ACCACAGTGAGGAATGTCCA   | Vim    | 22352  | CGCCATCAACACTGAGTTCAA           | TGGCAAAGCGGTCATTCA     |
| Junb   | 16477  | GCCTTTCTATCACGACACT   | AAGGTGGGTTTCAGGAGTTT   | Wnt1   | 22408  | TGTTGCGGTTCTGATGTAT             | CTATAGGACCCGAGAGACA    |
| Kdm6a  | 22289  | AGTTCTGCACCACTGTATT   | TTGACACTCCACTTGGA      | Ym1    | 12655  | AGCATGGTGGTTTTACAGGA            | CTGTACCAGCTGGGAAGAAA   |

| <b>Table S2. PCR primers Matrix ChIP-qPCR</b> |                  |                      |                         |
|-----------------------------------------------|------------------|----------------------|-------------------------|
| <b>Primer</b>                                 | <b>Entrez ID</b> | <b>FWD Sequence</b>  | <b>REV Sequence</b>     |
| ApoE Exon1                                    | 11816            | CAATTTTCCCTCCGCAGAC  | GTCAGCAATGTGACCAACAG    |
| Epo Exon1                                     | 13856            | GTGATCTGGCCCTACAGAAC | GAGCTCCTTAGCGACCC       |
| Hmox Exon1                                    | 15368            | GAGCCTGAATCGAGCAGAAC | AGCTACAGGTAGACTGGGCG    |
| Hpx Promoter-Exon1                            | 15458            | GGGTGGTGTGTTACCAGTT  | CCCAGCAACACCAGGATATT    |
| Igfbp7 Exon1                                  | 29817            | GCATCCAGCCACTTATGAT  | AAGAGGAGGAAGAGGAGAGG    |
| Kdr Exon1                                     | 16542            | GAGTCTGTGCCTGAGAACTG | CAGAACCACAGACGACA       |
| Kim1(Havcr1) Exon3                            | 171283           | TGGAGATTCTGGATGGTTT  | TAGAAGCTTACCTGGTTAACTTG |
| Klotho Exon1                                  | 16591            | CGCCTACCAGACCGAGG    | GTGGGTGAACGTATCCAG      |
| Kmt1b (Suv39h2) Exon1                         | 65707            | CAGCGAGCGTGGTCC      | CTTGAATAAGGCACCTCGTG    |
| Lrp5 Exon2                                    | 16973            | CTTCCAGTTCTCAAGGGTG  | TCTGGTTCAGGTAGGTCTGT    |
| Ngal (Lcn2) Exon1                             | 16819            | ACTCAGAACTGATCCCTGC  | CCTTCAGGGTCTACCTGAT     |
| Pnmt Exon1                                    | 18948            | GCCTATCTCCGCAACAACTA | CAAAGACTGTGCCATGCAG     |
| Spp1 (Osteopontin) Intron1                    | 20750            | GGCTGAATTCTGAGGGTGAG | AAAGACCAGAACAGCACGAG    |
| Timp1 Exon1                                   | 21857            | TGCCAGACTAACTGCTCACG | TTAAAGGCTTGTGGGTTTGG    |
| Timp2 Exon1                                   | 21858            | GATCCTCGGAGCGCAATAA  | CTCCTCCGCTGCCTTCTATG    |
| Tlr4 Exon1                                    | 21898            | GAAAATGCCAGGATGATGCC | ATTCAAGCTTCTGGGTCA      |
| Tnf Exon1                                     | 21926            | AGTGCCTCTTCCAGTTC    | GCAGGTTCTGCCCTTTCAC     |
| Vcam1 Exon1                                   | 22329            | GGTCAGGAAAAGCCAGAGAT | GGGCTGAAGTCATTCTGAGT    |

Table S3

| <b>Antibody</b>  | <b>Catalogue No</b> | <b>Source</b>     | <b>Manufacturer</b> |
|------------------|---------------------|-------------------|---------------------|
| Pol II CTD (4H8) | sc-47701            | Mouse monoclonal  | Santa Cruz          |
| H3K9me2          | 720092              | Rabbit polyclonal | ThermoPierce        |
| H3K9me3          | 701784              | Rabbit monoclonal | ThermoPierce        |
| H3K14me2         | MA3-059             | Mouse monoclonal  | ThermoPierce        |
| H3K27ac          | 720096              | Rabbit polyclonal | ThermoPierce        |
| H3K4m1           | OAAH00066           | Rabbit            | Aviva               |
| H3K4m2           | OAAH00067           | Rabbit            | Aviva               |
| H3K4m3           | OAAH00068           | Rabbit            | Aviva               |
| H3K27me3         | 720069              | Rabbit polyclonal | ThermoPierce        |

| <b>Table S4. Gene function</b> |                                                                                                                                                              |
|--------------------------------|--------------------------------------------------------------------------------------------------------------------------------------------------------------|
| <b>Gene</b>                    | <b>Function</b>                                                                                                                                              |
| Acta2                          | alpha-2 actin proteins in smooth muscle; important for contraction                                                                                           |
| Actb                           | beta-actin; important for motility and cell shape                                                                                                            |
| Actc1                          | Actin; defects linked with idiopathic dilated and familial hypertrophic cardiomyopathy                                                                       |
| Actn4                          | Alpha actin found in non-muscle cells; involved in binding actin to the membrane                                                                             |
| Ager                           | Advanced glycosylation end product-specific receptor; Believed to be pro-inflammatory                                                                        |
| Agt                            | Angiotensinogen; regulates balance of fluid and salts in the body and blood pressure                                                                         |
| Angpt1                         | Angiopietin; involved in angiogenesis                                                                                                                        |
| Angpt2                         | Endothelial cell-derived regulator of angiogenesis and ligand for endothelial-specific receptor tyrosine kinase                                              |
| Aoc1                           | Amine oxidase, copper-containing 1; part of the oxidoreductase family                                                                                        |
| Apoe                           | Apolipoprotein E which binds to a specific liver receptor; essential for catabolism of triglyceride-rich lipoproteins.                                       |
| Arg1                           | Arginase; Involved in the urea cycle which processes excess nitrogen to be excreted by the kidneys.                                                          |
| Axin2                          | Downregulates beta-catenin and is an inhibitor of the Wnt signaling pathway.                                                                                 |
| Bax                            | Apoptosis regulator; Part of Bcl2-gene family.                                                                                                               |
| Bcl2                           | Mitochondrial-mediated apoptosis inhibitor; Abnormal expression has been associated with cancer.                                                             |
| Bcl2l1                         | Regulates programmed mitochondrial-mediated apoptosis during development and tissue homeostasis.                                                             |
| Bmp7                           | Bone morphogenetic protein 7; ligand of TGF-beta used in gene regulation. Abnormal expression associated with developmental defects including kidney defect. |
| Ccl2                           | Chemokine (C-C motif) ligand 2; chemotactic activity for monocytes and memory T cells                                                                        |
| Cdkn1a                         | Cyclin-dependent kinase inhibitor 1A; Cell cycle regulator at the G1 phase.                                                                                  |
| Chil3                          | Chitinase-like 3; Possible involvement in inflammation and allergy.                                                                                          |
| Clu                            | Clusterin; Possible involvement in cell death, tumor progression and neurodegenerative disorders.                                                            |
| Col11a1                        | Alpha-1 subunit of type XI collagen; Necessary for embryonic cartilage development.                                                                          |
| Col13a1                        | Alpha-1 subunit of type XIII collagen                                                                                                                        |
| Cst3                           | Cystatin-C; Cysteine protease inhibitor; Inhibits beta-amyloid aggregation; Possible biomarker for atherosclerosis                                           |
| Ctgf                           | Connective tissue growth factor; Involved in many biological processes including cell adhesion, migration and angiogenesis.                                  |
| Ctnnb1                         | Beta-catenin; Involved in cell adhesion, cell communication and the Wnt signaling pathway.                                                                   |
| Cubn                           | Cubilin; Primarily found in the kidneys; involved in reuptake of proteins and vitamins (e.g. vitamin B12) that would otherwise be lost in urine.             |
| Cxcl1                          | Chemokine ligand 1; Possible association with neutrophil-recruitment; Deficiency in mouse was linked to colitis.                                             |
| Dusp1                          | Dual specificity phosphatase 1; anti-inflammatory functions                                                                                                  |
| Dvl1                           | Dishevelled segment polarity protein 1; Regulates Wnt signaling and planar cell polarity pathways.                                                           |
| Edn1                           | Endothelin 1; primarily involved in vasoconstriction; therapeutic target for pulmonary arterial hypertension.                                                |
| Egf                            | Epidermal growth factor; Involved in cell proliferation and differentiation.                                                                                 |
| Egfr                           | Epidermal growth factor receptor                                                                                                                             |
| Egr1                           | Early growth response protein 1; transcription regulator; possible tumor suppressor                                                                          |

|              |                                                                                                                                                                                          |
|--------------|------------------------------------------------------------------------------------------------------------------------------------------------------------------------------------------|
| Ehmt2        | Euchromatic histone-lysine N-methyltransferase 2; catalyzes demethylation of H3K9                                                                                                        |
| Epo          | Erythropoietin; Regulates production of red blood cells; primarily expressed in the liver during fetal development and in the kidney as adults.                                          |
| Ezh2         | Enhancer of zeste homolog 2; transcriptional repressor of tumor suppressor genes by histone methylation.                                                                                 |
| Fabp1        | Fatty acid-binding protein 1; primarily expressed in the liver; involved in binding, transport and metabolism of long-chain fatty acids. Abnormal expression has been linked to obesity. |
| Fasn         | Fatty acid synthase                                                                                                                                                                      |
| Fgf10        | Fibroblast growth factor 10                                                                                                                                                              |
| Fit1         | FMS-like tyrosine kinase 1; vascular endothelial growth factor receptor family; involved in angiogenesis and vasculogenesis                                                              |
| Fn1          | Fibronectin 1; Involved in blood clotting, wound healing, formation of the extracellular matrix, cell migration and cell differentiation.                                                |
| Foxo1        | Forkhead box O1; Involved in the regulation of gluconeogenesis and glycogenolysis.                                                                                                       |
| Fyn          | Proto-oncogene tyrosine-protein kinase Fyn; Regulates cell growth; Often associated with T cell and neuronal signaling.                                                                  |
| Fzd1         | Frizzled class receptor 1; Receptors for Wnt signaling proteins.                                                                                                                         |
| Gapdh        | Glyceraldehyde-3-phosphate dehydrogenase; Many functions including mRNA stability regulation.                                                                                            |
| Gdnf         | Glial cell line derived neurotrophic factor; promotes survival of many types of neurons; involved in kidney development.                                                                 |
| Grp          | Gastrin releasing peptide; Affects neuroendocrine regulation, gastrointestinal secretion, nociception, cell proliferation and inflammation.                                              |
| Gsk3a        | Glycogen synthase kinase 3 alpha; Regulates glycogen synthase; Involved in the Wnt signaling pathway.                                                                                    |
| Hamp         | Hepcidin antimicrobial peptide; hormonal regulator of iron metabolism.                                                                                                                   |
| Havcr1/Kim-1 | Hepatitis A virus cellular receptor 1; membrane receptor for hepatitis A virus and TIMD4 (T-cell membrane protein 4).                                                                    |
| Hdac9        | Histone deacetylase 9; Transcriptional regulator                                                                                                                                         |
| Hif1a        | Hypoxia inducible factor 1; Regulator of cellular and developmental response to hypoxia.                                                                                                 |
| Hmgcr        | HMG-CoA reductase; rate-controlling enzyme of the mevalonate pathway which produces cholesterol.                                                                                         |
| Hmgcs1       | HMG-CoA synthase 1                                                                                                                                                                       |
| Hmox1        | Heme oxygenase 1; essential enzyme in heme catabolism                                                                                                                                    |
| Hpx          | Hemopexin; Deficiency is associated with several inflammatory diseases such as septic shock.                                                                                             |
| Icam1        | Intercellular adhesion molecule 1; participates in innate immune response; binds leukocyte adhesion protein LFA-1                                                                        |
| Ifng         | Interferon gamma; active in both innate and adaptive immune systems in response to viral and microbial infections.                                                                       |
| Igf1         | Insulin-like growth factor; promotes development during fetal and postnatal life; predominantly expressed in the liver.                                                                  |
| Igfbp7       | Insulin-like growth factor binding protein 7                                                                                                                                             |
| IL10         | Interleukin 10; anti-inflammatory cytokine essential for suppressing immune and autoimmune responses.                                                                                    |
| IL18         | Interleukin 18; pro-inflammatory cytokine                                                                                                                                                |
| IL6          | Interleukin 6; inducer of the acute phase in an inflammatory response; plays role in maturation of B cells.                                                                              |
| Junb         | Jun B proto-oncogene; transcription factor involved in gene regulation after the primary growth factor response.                                                                         |
| Kdm6a        | Lysine-specific demethylase 6A; primarily linked to demethylation of lysine residues on H3K27.                                                                                           |
| Kdm6b        | KDM1 lysine-specific demethylase 6B                                                                                                                                                      |
| Kdr          | Kinase insert domain receptor; encodes one of two receptors of the vascular endothelial growth factor which is responsible for endothelial proliferation, survival and migration.        |
| Kirrel       | Kin of IRRE-like protein 1; Expressed in kidney podocytes which are involved in the ultrafiltration of blood.                                                                            |

|                |                                                                                                                                                                                                           |
|----------------|-----------------------------------------------------------------------------------------------------------------------------------------------------------------------------------------------------------|
| Kl             | Klotho; primarily found in the kidney; involved in phosphate homeostasis, bone development and bone strength maintenance.                                                                                 |
| Klf2           | Kruppel-like factor 2; primarily expressed in adult lungs; Involved in lung development, embryonic erythropoiesis and adipogenesis.                                                                       |
| Klf4           | Kruppel-like factor 4; primarily expressed in the gut; Involved in cell proliferation, differentiation and apoptosis.                                                                                     |
| Lama1          | Laminin subunit alpha 1; Involved in cell adhesion, differentiation, migration, signaling, neurite outgrowth and metastasis.                                                                              |
| Lama2          | Laminin subunit alpha 2                                                                                                                                                                                   |
| Lama3          | Laminin subunit alpha 3                                                                                                                                                                                   |
| Lama5          | Laminin subunit alpha 5                                                                                                                                                                                   |
| Lamb1          | Laminin subunit beta 1                                                                                                                                                                                    |
| Lamb2          | Laminin subunit beta 2                                                                                                                                                                                    |
| Lamb3          | Laminin subunit beta 3                                                                                                                                                                                    |
| Lamc1          | Laminin subunit gamma 1                                                                                                                                                                                   |
| Lamc2          | Laminin subunit gamma 2                                                                                                                                                                                   |
| Lamc3          | Laminin subunit gamma 3                                                                                                                                                                                   |
| Lcn2/Ngal      | Lipocalin-2; biomarker of kidney injury                                                                                                                                                                   |
| Ldlr           | Low density lipoprotein (LDL) receptor; LDLs are the primary carriers of cholesterol in blood.                                                                                                            |
| Lrp5           | Low density lipoprotein receptor-related protein 5; Involved in Wnt signaling pathway which is important for cell proliferation, adhesion and migration.                                                  |
| Mbd3           | Methyl-CpG binding domain protein 3; transcriptional repressor                                                                                                                                            |
| Muc1           | Mucin 1; Component of mucus; Involved in cell signaling and kidney development.                                                                                                                           |
| Myc            | Myelocytomatosis oncogene; Plays role in cell cycle progression, apoptosis and cellular transformation.                                                                                                   |
| Nek1           | NIMA (never in mitosis gene a)-related kinase 1; Possible involvement in meiosis, polycystic kidney disease and amyotrophic lateral sclerosis.                                                            |
| Nos3           | Nitric oxide synthase 3; Regulates vascular tone, cellular proliferation, leukocyte adhesion and platelet aggregation in the cardiovascular system.                                                       |
| Nphs2          | Podocin; Assists with filtration in the kidneys and podocyte cell signaling.                                                                                                                              |
| Ntn1           | Netrin 1; Thought to be involved with developmental axon guidance and cell migration.                                                                                                                     |
| Pdgfb          | Platelet derived growth factor B; Involved in cell growth, proliferation, differentiation and movement.                                                                                                   |
| Pdgfrb         | Platelet derived growth factor receptor B                                                                                                                                                                 |
| Pecam1         | Platelet/endothelial cell adhesion molecule 1; plays role in removing aged neutrophils from the body, leukocyte migration, angiogenesis and integrin activation.                                          |
| Pnmt           | Phenylethanolamine-N-methyltransferase; primarily expressed in the adrenal medulla; converts norepinephrine to epinephrine.                                                                               |
| Pou5f1         | POU domain, class 5, transcription factor; regulates cell specific differentiation pathways; plays key role in embryonic development and stem cell pluripotency.                                          |
| Ppia           | Peptidylprolyl isomerase A; Involved in many biological processes including apoptosis and inflammation.                                                                                                   |
| Ptgs2          | Prostaglandin-endoperoxide synthase 2; upregulated during inflammation                                                                                                                                    |
| Rpl32          | 60 S Ribosomal protein L32                                                                                                                                                                                |
| S100a4         | S100 calcium binding protein A4; Involved in many cellular processes including cell cycle progression and differentiation.                                                                                |
| Sema3a         | Semaphorin-3A; important for normal neuronal pattern development; can function as a chemorepulsive agent, by inhibiting axonal growth, or as a chemoattractive agent, stimulating apical dendrite growth. |
| Serpine1/PAI-1 | Serine peptidase inhibitor; fibrinolysis inhibitor; high protein concentrations can lead to thrombophilia                                                                                                 |
| Sox2           | Sex determining region Y-box 2; Necessary to maintain pluripotency of undifferentiated embryonic stem cells.                                                                                              |



|                  |                                                                                                                                                                                                                                                                                                                                                                     |
|------------------|---------------------------------------------------------------------------------------------------------------------------------------------------------------------------------------------------------------------------------------------------------------------------------------------------------------------------------------------------------------------|
| Spp1/osteopontin | Secreted phosphoprotein 1; Osteopontin; Many functions including bone remodeling, biomineralization, increased myocyte apoptosis, cell attachment, wound healing and chemotaxis.                                                                                                                                                                                    |
| Srp14            | Subunit of a ribonucleoprotein; mediates secretory proteins movement to the endoplasmic reticulum                                                                                                                                                                                                                                                                   |
| Suv39h2/Kmt1b    | Suppressor of variegation 3-9 homolog 2; Histone-lysine N-methyltransferase; exclusively found in testis among normal tissue but is upregulated in many cancers including lung, cervical and bladder cancer.<br><a href="http://www.sciencedirect.com/science/article/pii/S1936523315000595">http://www.sciencedirect.com/science/article/pii/S1936523315000595</a> |
| Tek/Tie2         | Endothelial-specific receptor tyrosine kinase; Important for angiogenesis.                                                                                                                                                                                                                                                                                          |
| Tgfb1            | Transforming growth factor beta 1; Regulates cell proliferation, differentiation and growth; Plays role in regulation of other growth factors including interferon gamma and tumor necrosis factor alpha.                                                                                                                                                           |
| Timp1            | Tissue inhibitor of metalloproteinase 1; Inhibits extracellular matrix degradation; Promotes cell proliferation in many cell types; Possible anti-apoptotic functions.                                                                                                                                                                                              |
| Timp2            | Tissue inhibitor of metalloproteinase 2; Plays unique role in the Timp family of directly suppressing endothelial cell proliferation; Important for tissue homeostasis maintenance.                                                                                                                                                                                 |
| Timp3            | Tissue inhibitor of metalloproteinase 3; Localized to extracellular matrix; Responds to mitogenic stimulation.                                                                                                                                                                                                                                                      |
| Tirap            | Toll-interleukin 1 receptor domain-containing adaptor protein; Involved in the TLR4 signaling pathway of the innate immune system.                                                                                                                                                                                                                                  |
| Tlr1             | Toll-like receptor 1; Recognizes diacylated and triacylated lipopeptides in the TLR2 signaling pathway of the innate immune response.                                                                                                                                                                                                                               |
| Tlr2             | Toll-like receptor 2; Forms heterodimers with other TLRs to recognize pathogen-associated molecular patterns; Possible role in promoting apoptosis in response to bacterial lipoproteins.                                                                                                                                                                           |
| Tlr4             | Toll-like receptor 4; Mediates innate immune response to bacterial lipopolysaccharide, a component of Gram-negative bacteria.                                                                                                                                                                                                                                       |
| Tnf              | Tumor necrosis factor; Proinflammatory cytokine that plays a role in the innate immune response and regulating homeostasis; Possible role in diseases of chronic inflammation.                                                                                                                                                                                      |
| Trp53/p53        | Transformation related protein 53; tumor suppressor                                                                                                                                                                                                                                                                                                                 |
| Vcam1            | Vascular cell adhesion molecule 1; Involved in adhesion of lymphocytes, monocytes, eosinophils and basophils to vascular endothelium.                                                                                                                                                                                                                               |
| Vegfa            | Vascular endothelial growth factor A; Induces vascular endothelial cell proliferation and migration; Essential for angiogenesis; Upregulated in many known tumors and expression correlates with tumor stages.                                                                                                                                                      |
| Vim              | Vimentin; Component of the cytoskeleton; Organizer of several proteins involved in attachment, migration and cell signaling.                                                                                                                                                                                                                                        |
| Wnt1             | Wingless-type MMTV integration site family, member 1; Plays a role in several developmental processes such as cell fate regulation during embryogenesis; Possible involvement in CNS development                                                                                                                                                                    |

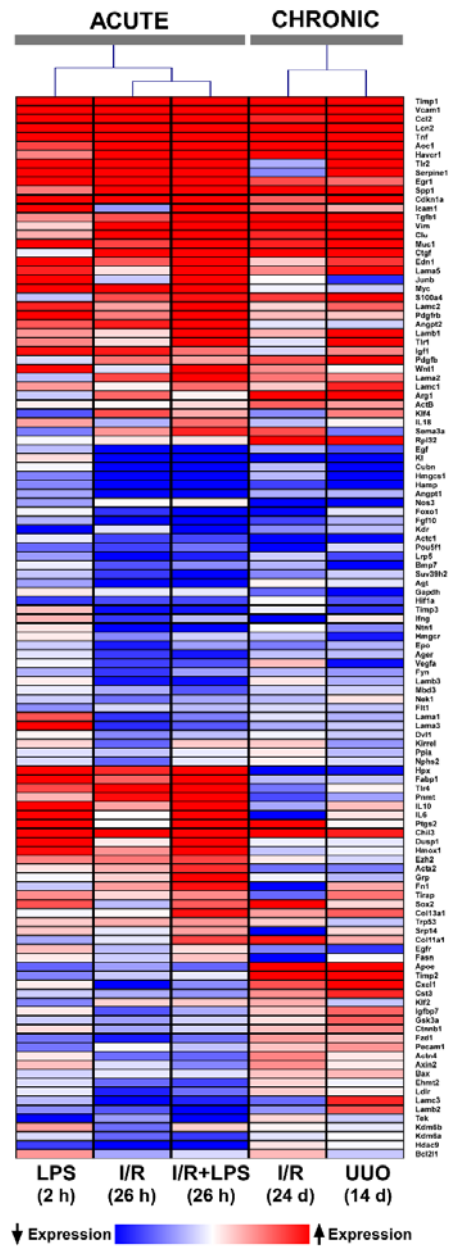

**Fig. S1. Integrated analysis of mRNAs encoding renal injury pathways and biomarkers from AKI and CKD models.**

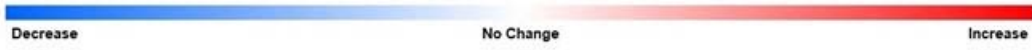

I

↑ AKI  
CKD

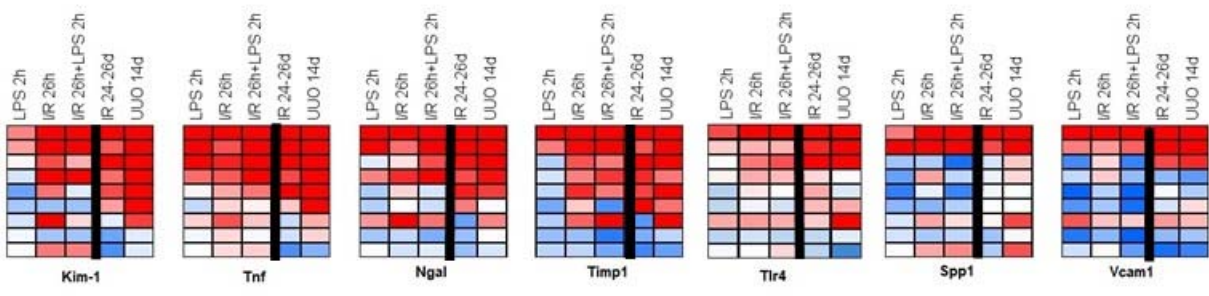

mRNA  
Pol II CTD  
H3K27Ac  
H3K4m3  
H3K4m2  
H3K4m1  
H3K27m3  
H3K9m2  
H3K9m3

II

↓ AKI  
CKD

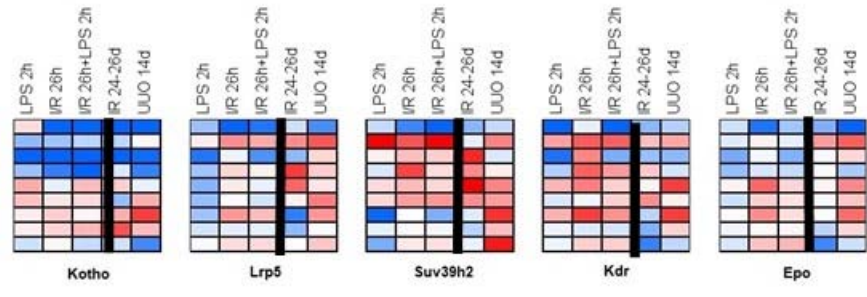

mRNA  
Pol II CTD  
H3K27Ac  
H3K4m3  
H3K4m2  
H3K4m1  
H3K27m3  
H3K9m2  
H3K9m3

III

↑ AKI

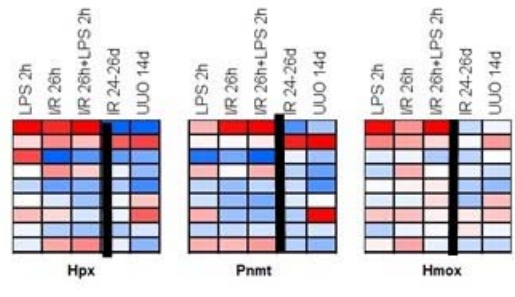

mRNA  
Pol II CTD  
H3K27Ac  
H3K4m3  
H3K4m2  
H3K4m1  
H3K27m3  
H3K9m2  
H3K9m3

IV

↑ CKD

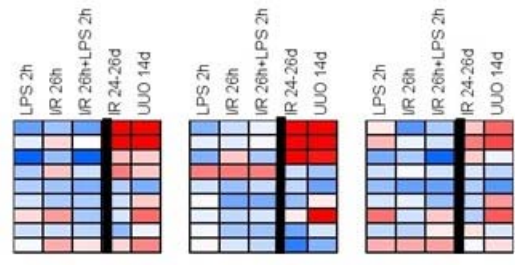

mRNA  
Pol II CTD  
H3K27Ac  
H3K4m3  
H3K4m2  
H3K4m1  
H3K27m3  
H3K9m2  
H3K9m3

**Fig.S2. Integrated transcriptional and epigenetic analysis of selected sets of renal injury genes from AKI and CKD models.** mRNA; total RNA extracted from the mouse kidneys was used in reverse transcription (RT) reactions and cDNA was used in real-time PCR (qPCR) with gene specific primers (Table S1). mRNA levels of a given gene in each sample was normalized to Rpl32. Matrix ChIP-qPCR; sheared cross-linked chromatin was (prepared from the same kidneys used in RT-qPCR) was analyzed in Matrix ChIP-qPCR using antibodies to RNA polymerase II (Pol II) and antibodies to permissive (H3K27Ac, H3K4m3, H3K4m2, H3K4m1) and repressive (H3K9m2, H3K27m3, H3K9m3) marks. qPCR primers were design to the 5'-end of the genes (Table S2). ChIP signals were calculated as fraction of input. Data represents log<sub>2</sub> transformed ratios of means from injured kidney over control (n=6 mice for each injury model). Shown are genes whose expression was upregulated in both AKI and CKD (I), downregulated in both AKI and CKD (II), upregulated in AKI but not in CKD III) and upregulated in CKD but not in AKI (IV).

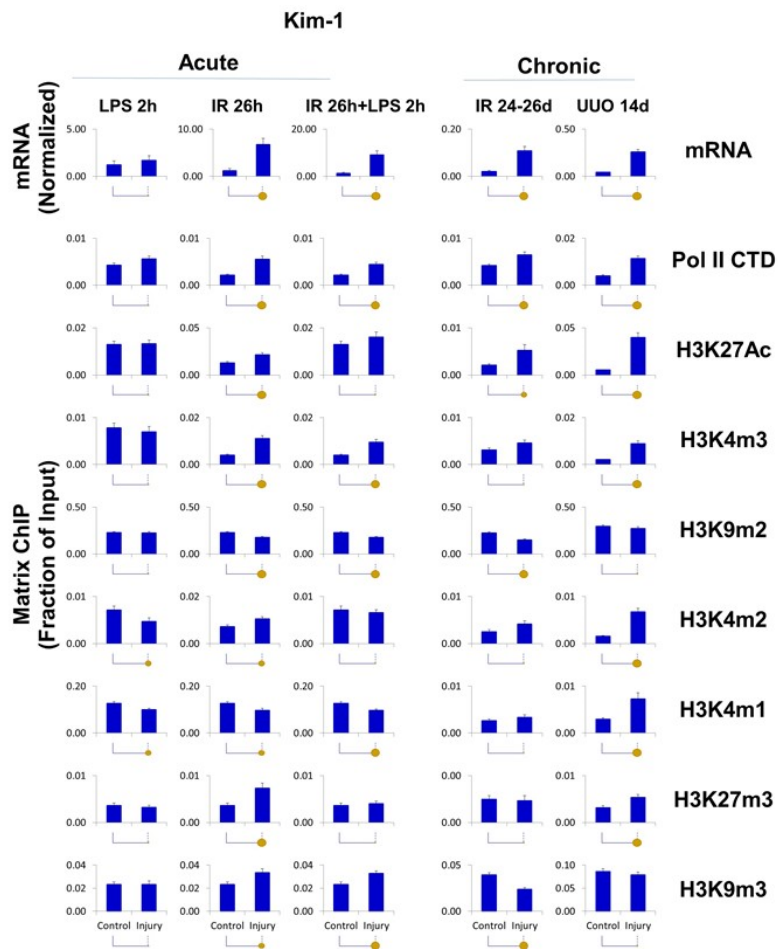

**Fig.S3. Transcriptional and epigenetic analysis of Kim-1 (*Havcr1*) gene in AKI and CKD models.** mRNA; total RNA extracted from injured (Injured) and control (Control) mouse kidneys was used in reverse transcription (RT) reactions. cDNA was used in real-time PCR (qPCR) with gene specific primers (Table S1). mRNA levels of a given gene in each sample was normalized to Rpl32. Matrix ChIP-qPCR; sheared cross-linked chromatin was (prepared from the same kidneys used in RT-qPCR) was analyzed in Matrix ChIP-qPCR using antibodies to RNA polymerase II (Pol II) and antibodies to permissive (H3K27Ac, H3K4m3, H3K4m2, H3K4m1) and repressive (H3K9m2, H3K27m3, H3K9m3) marks. ChIP signals were calculated as fraction of input. Data represents mean,  $n=6$  mice from each group. Statistical differences between two means (p value) are shown by the size of the solid circle under the x-axis:  $p < 0.05$  by small circle,  $p < 0.01$  by large circle, and no circle indicating the differences are not statistically significant.

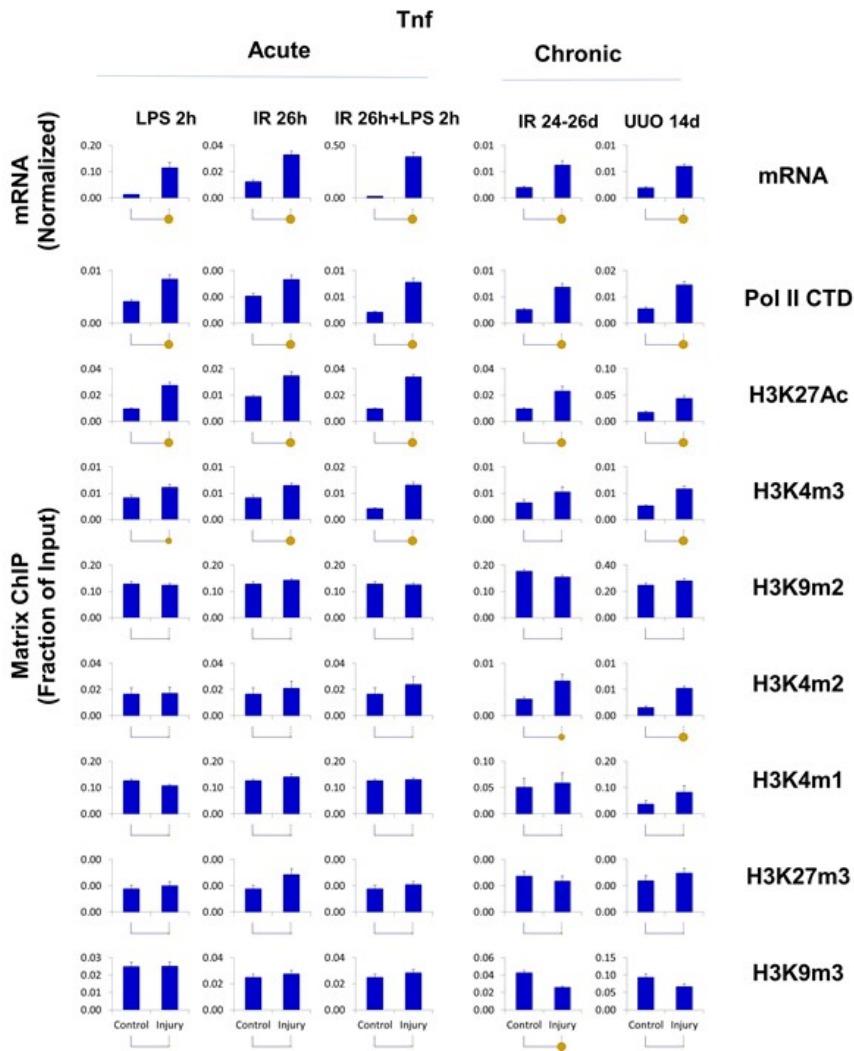

**Fig.S4. Transcriptional and epigenetic analysis of Tnf gene in AKI and CKD models.**

Transcript and ChIP assays and analysis were carried out as in Fig.S2 using primers to Tnf (Tables S1-2). Data represents mean , n=6 mice from each group.

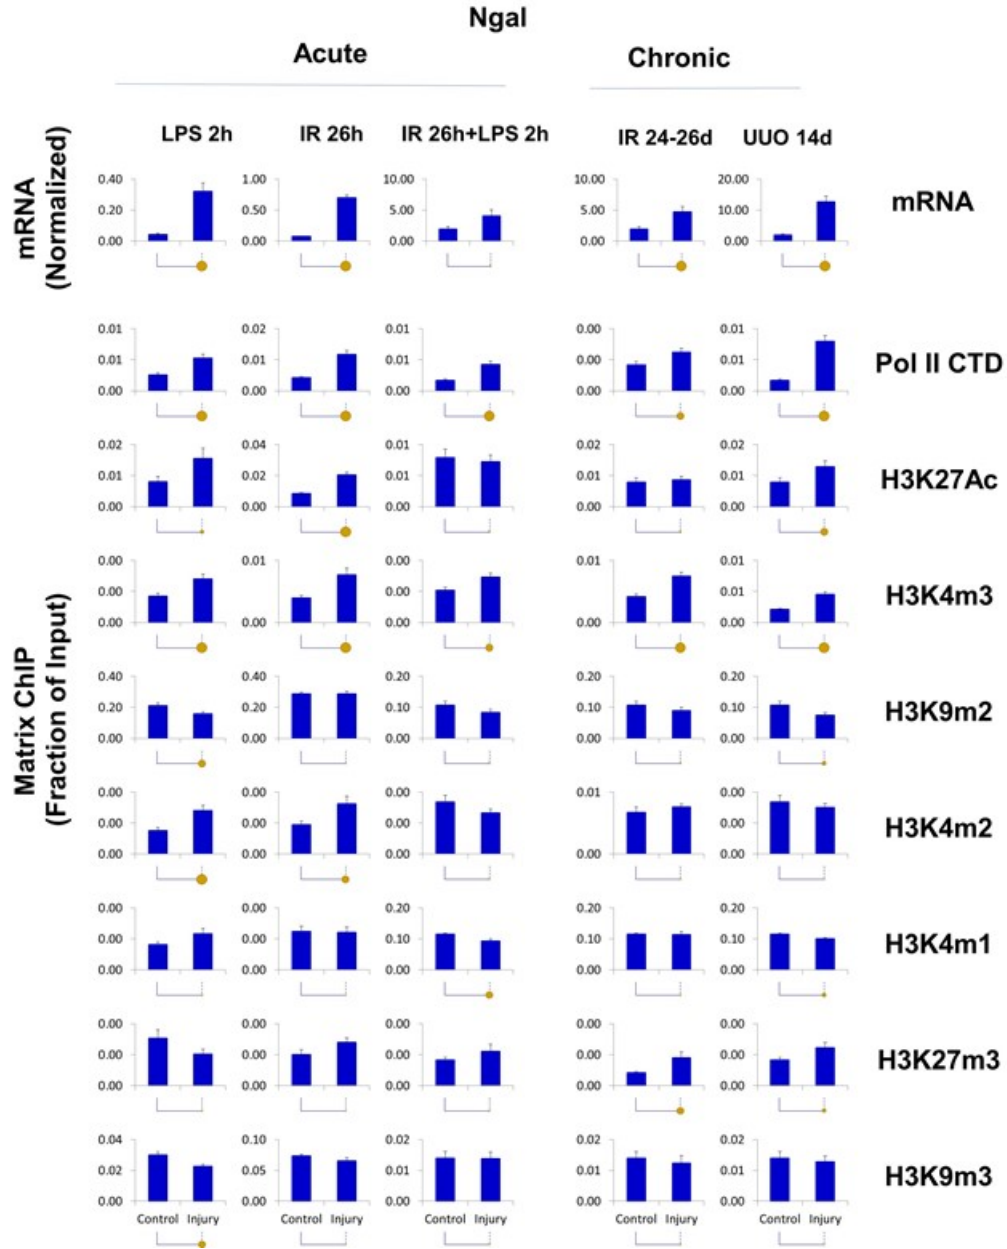

**Fig.S5. Transcriptional and epigenetic analysis of Ngal gene in AKI and CKD models.** Transcript and ChIP assays and analysis were carried out as in Fig.S2 using primers to Ngal (Tables S1-2). Data represents mean , n=6 mice from each group.

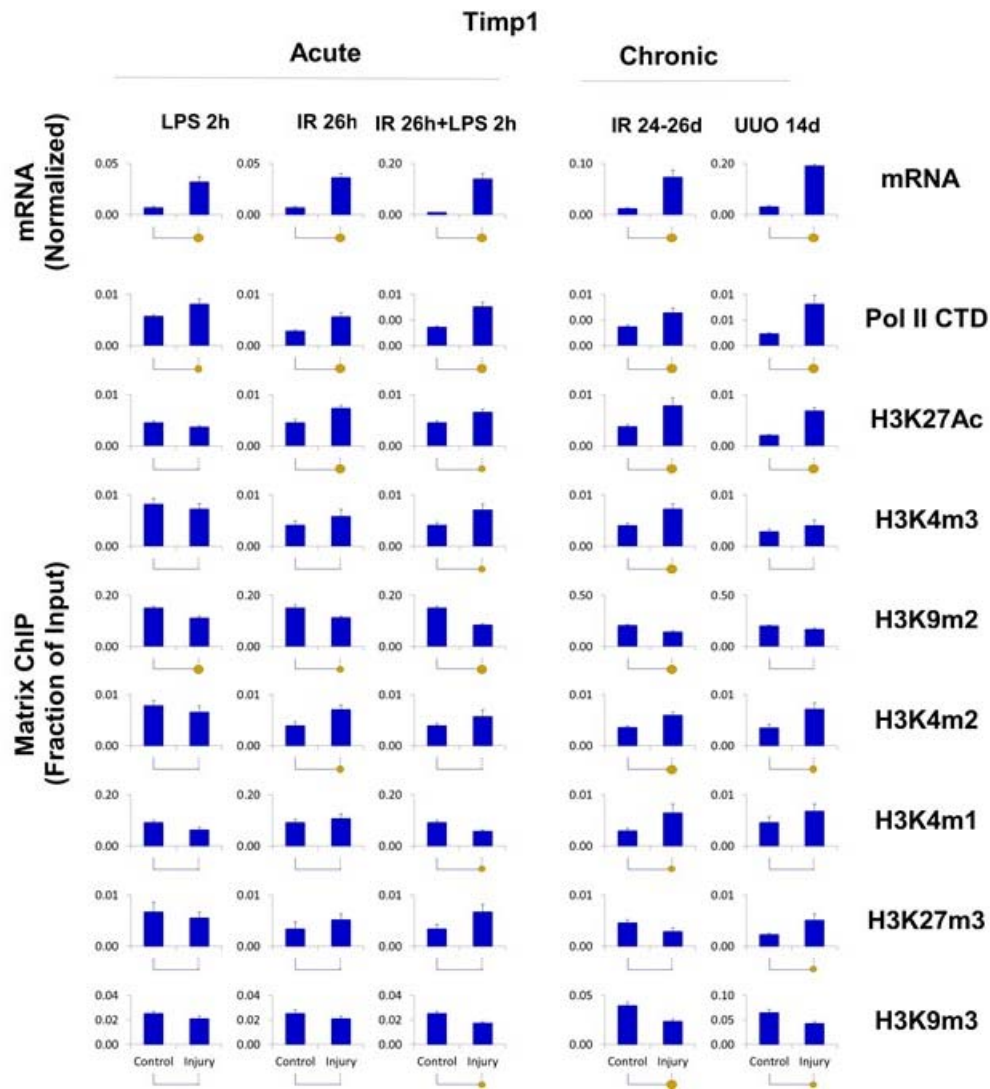

**Fig.S6. Transcriptional and epigenetic analysis of Timp1 gene in AKI and CKD models.** Transcript and ChIP assays and analysis were carried out as in Fig.S2 using primers to Timp1 (Tables S1-2). Data represents mean , n=6 mice from each group.



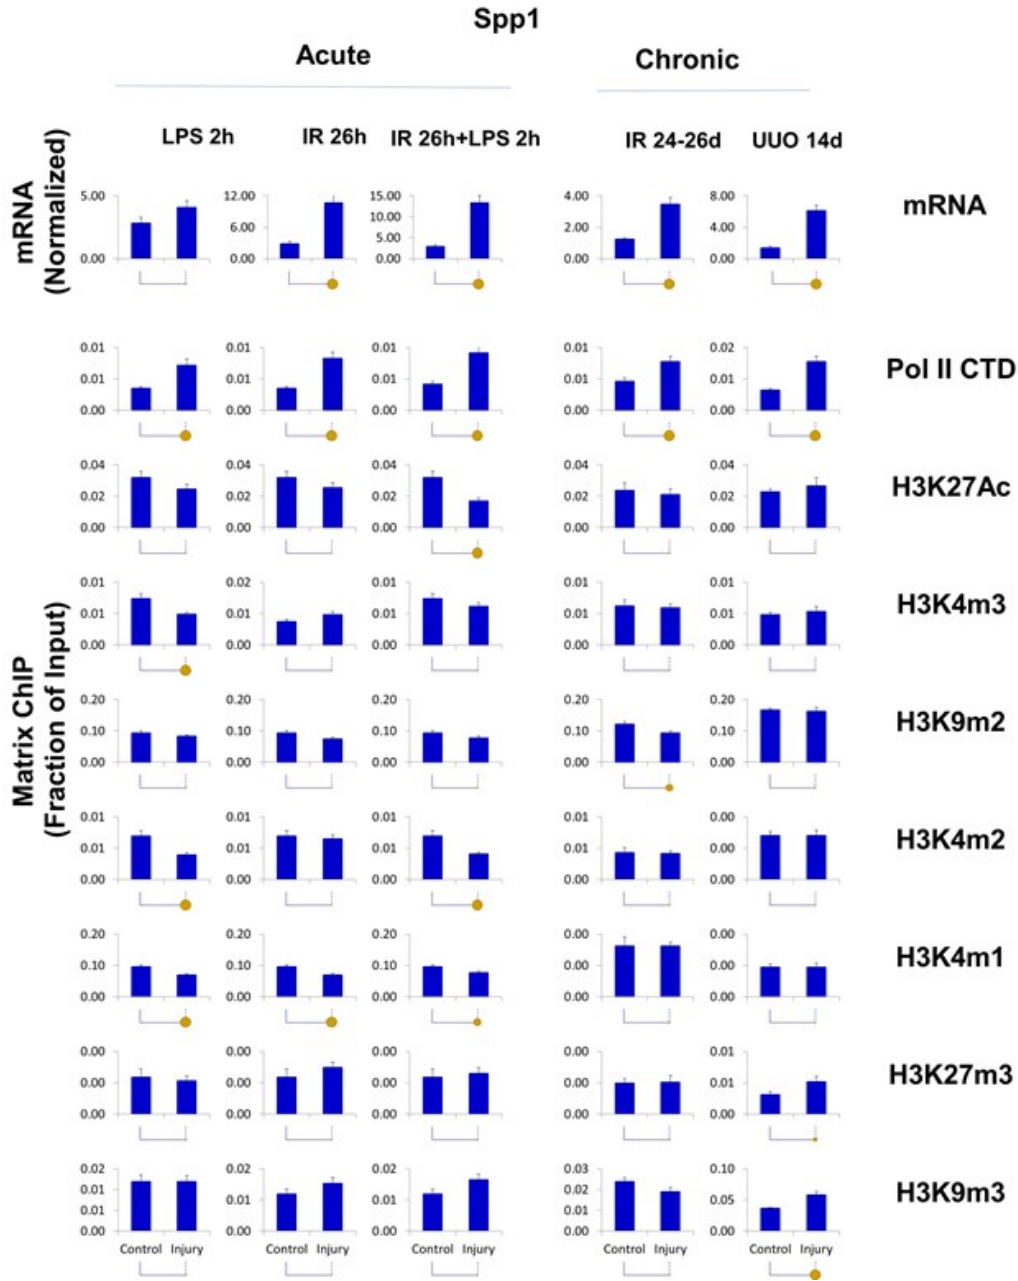

**Fig.S7. Transcriptional and epigenetic analysis of Spp1 gene in AKI and CKD models.** Transcript and ChIP assays and analysis were carried out as in Fig.S2 using primers to Spp1 (Tables S1-2). Data represents mean , n=6 mice from each group.

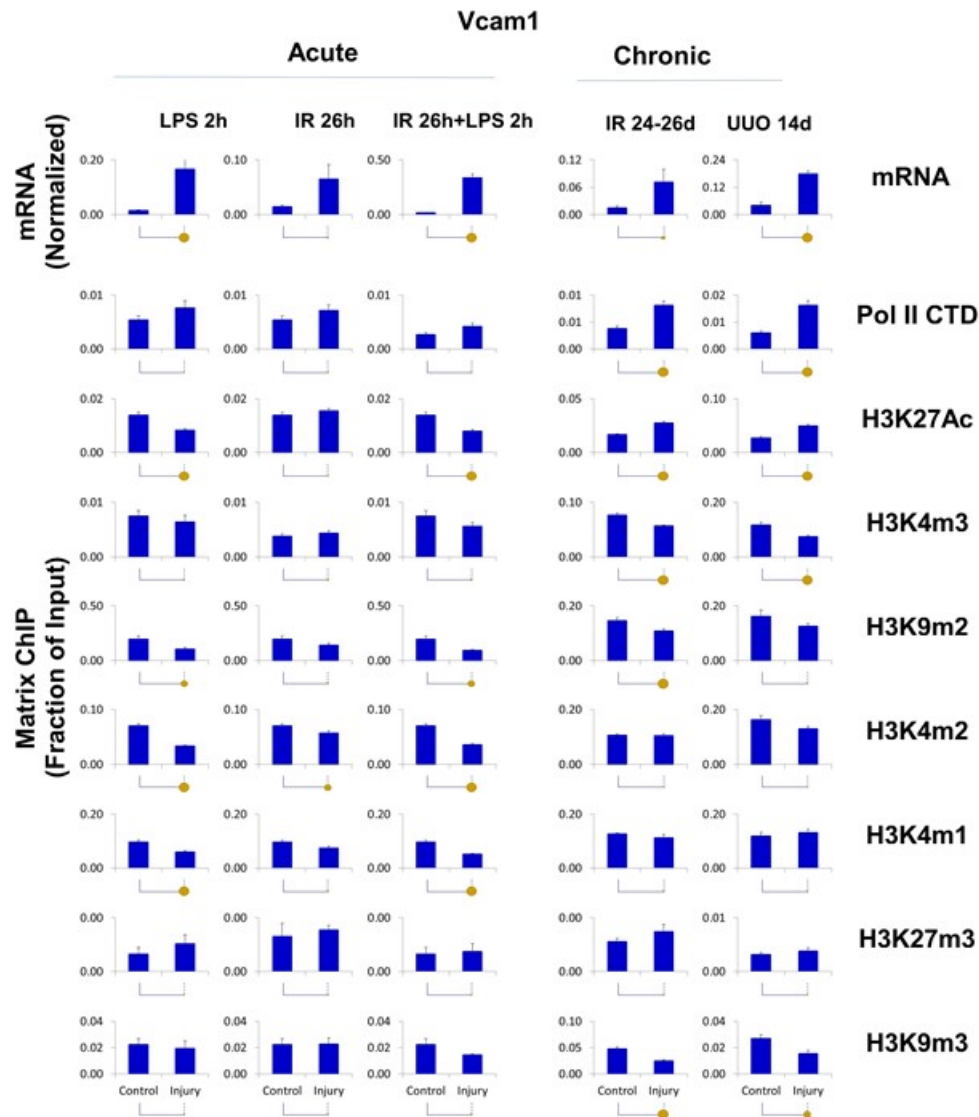

**Fig.S8. Transcriptional and epigenetic analysis of Vcam1 gene in AKI and CKD models.** Transcript and ChIP assays and analysis were carried out as in Fig.S2 using primers to Vcam1 (Tables S1-2). Data represents mean , n=6 mice from each group.

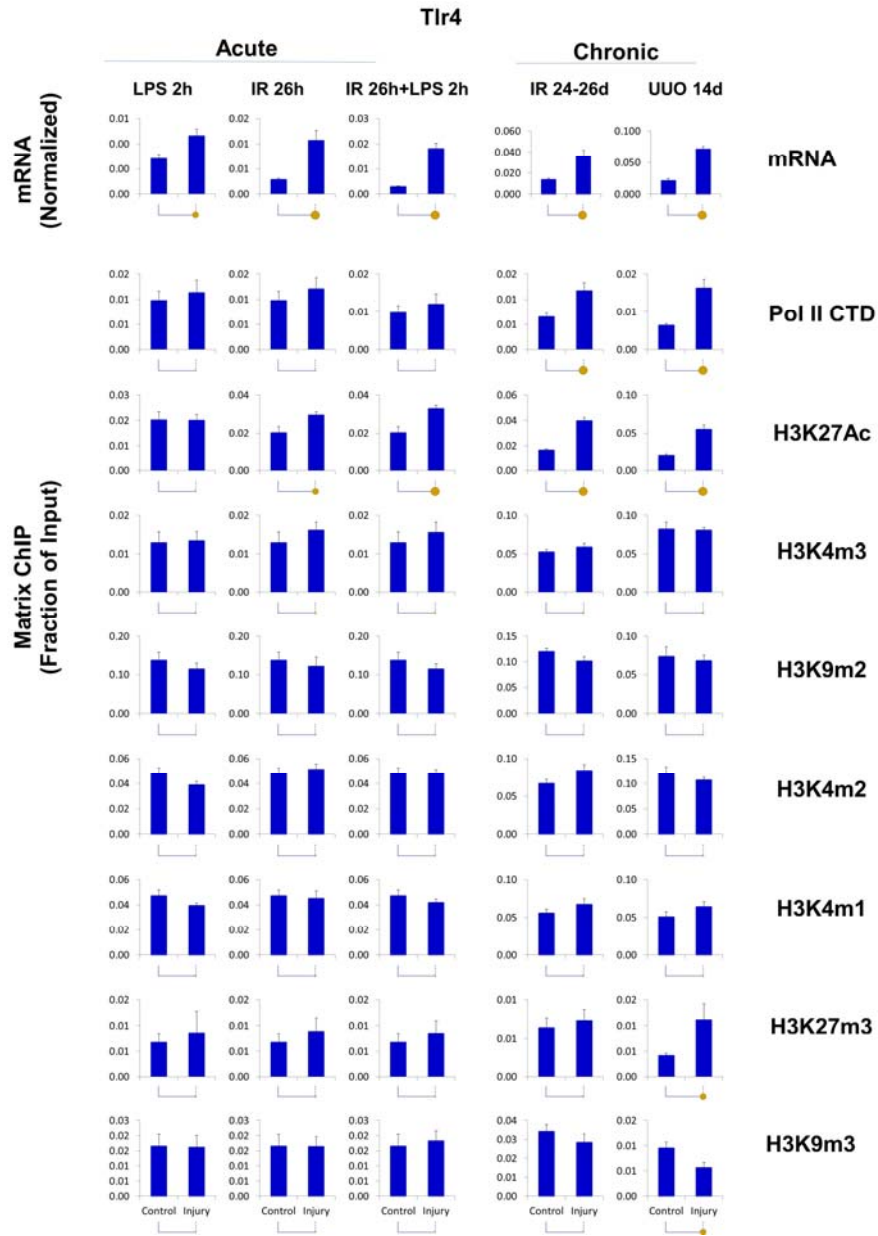

**Fig.S9. Transcriptional and epigenetic analysis of *Tlr4* gene in AKI and CKD models.**

Transcript and ChIP assays and analysis were carried out as in Fig.S2 using primers to *Tlr4* (Tables S1-2). Data represents mean, n=6 mice from each group.

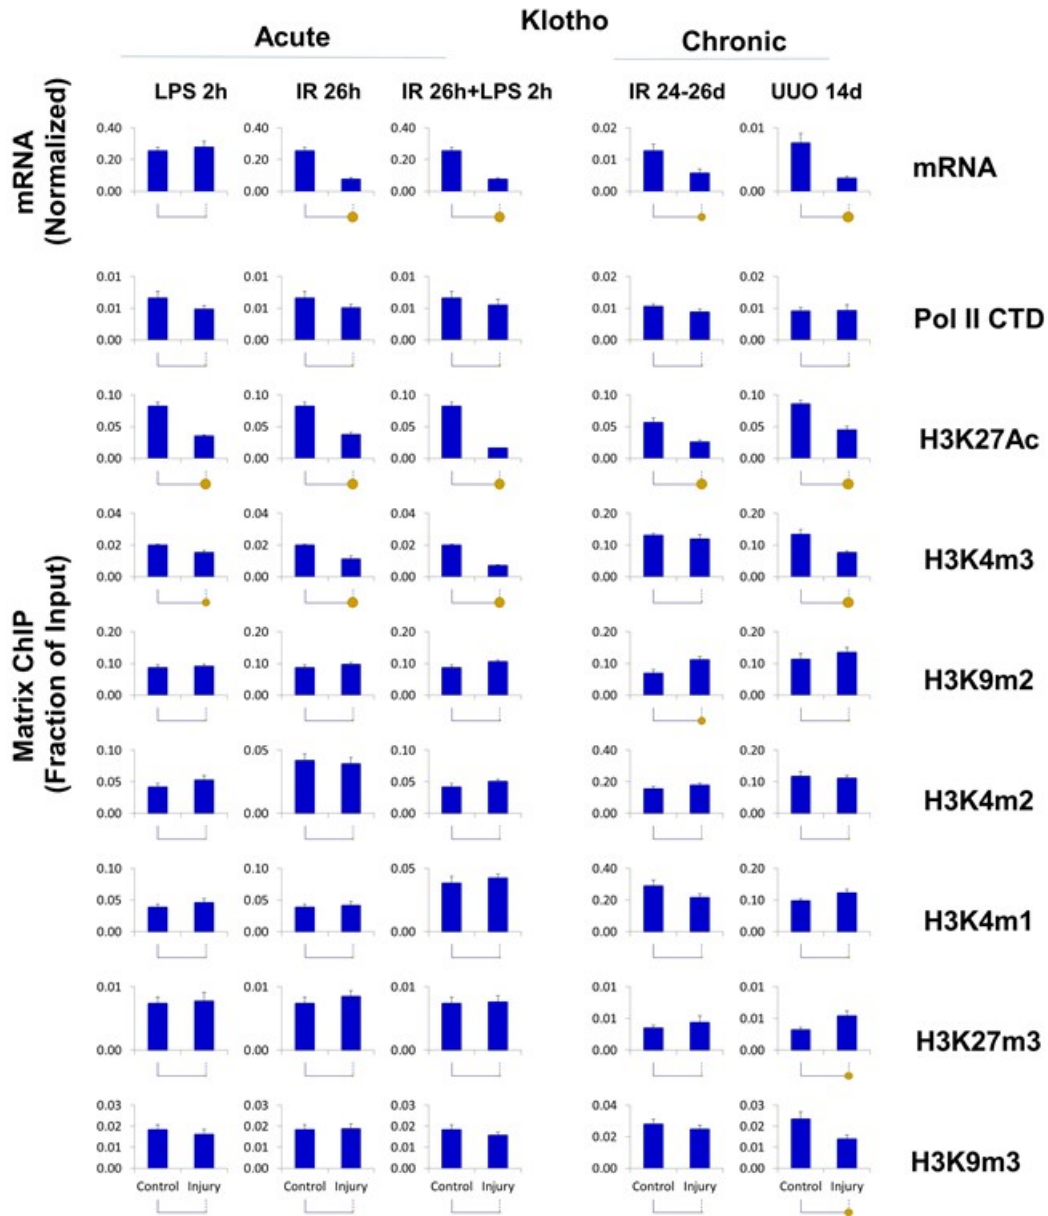

**Fig.S10. Transcriptional and epigenetic analysis of Klotho gene in AKI and CKD models.** Transcript and ChIP assays and analysis were carried out as in Fig.S2 using primers to Klotho (Tables S1-2). Data represents mean , n=6 mice from each group.

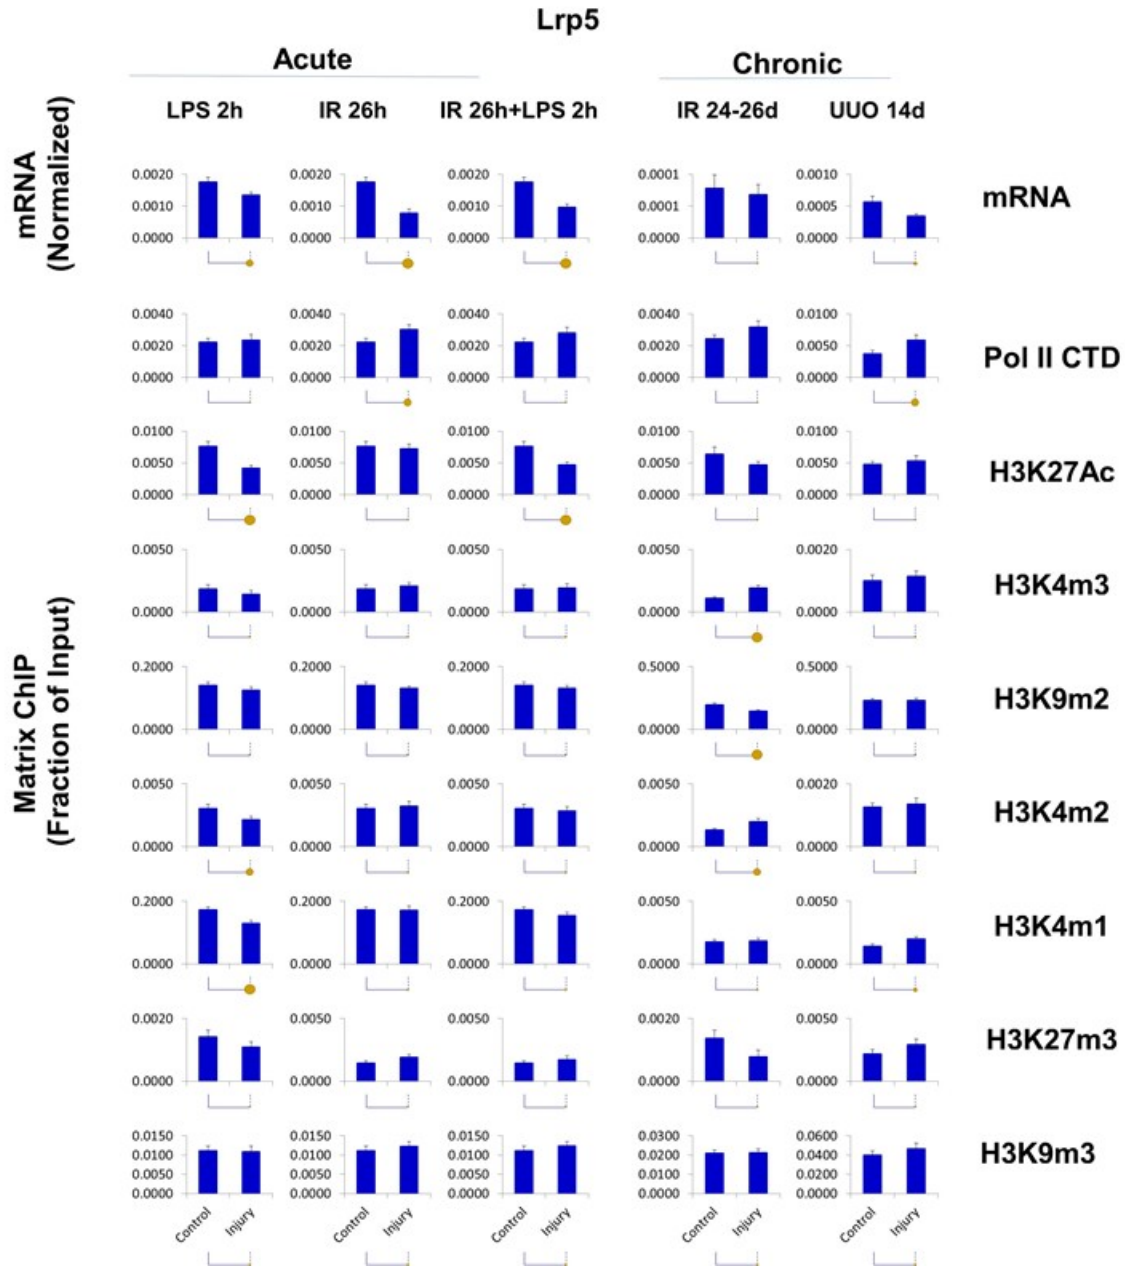

**Fig.S11. Transcriptional and epigenetic analysis of Lrp5 gene in AKI and CKD models.**

Transcript and ChIP assays and analysis were carried out as in Fig.S2 using primers to Lrp5 (Tables S1-2). Data represents mean , n=6 mice from each group.

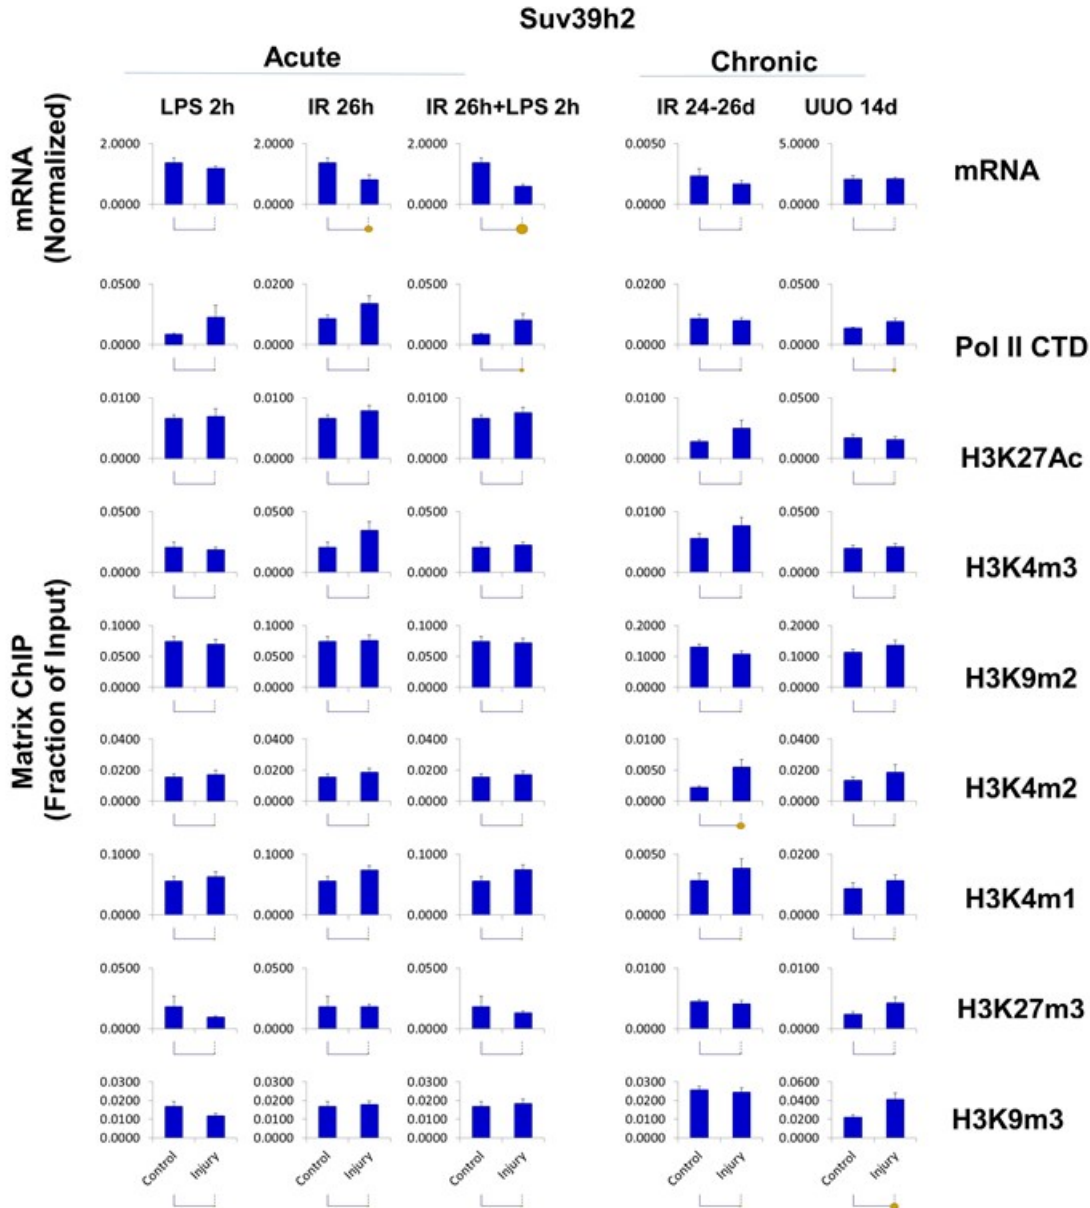

**Fig.S12. Transcriptional and epigenetic analysis of Suv39h2 gene in AKI and CKD models.**

Transcript and ChIP assays and analysis were carried out as in Fig.S2 using primers to Suv39h2 (Tables S1-2). Data represents mean , n=6 mice from each group.

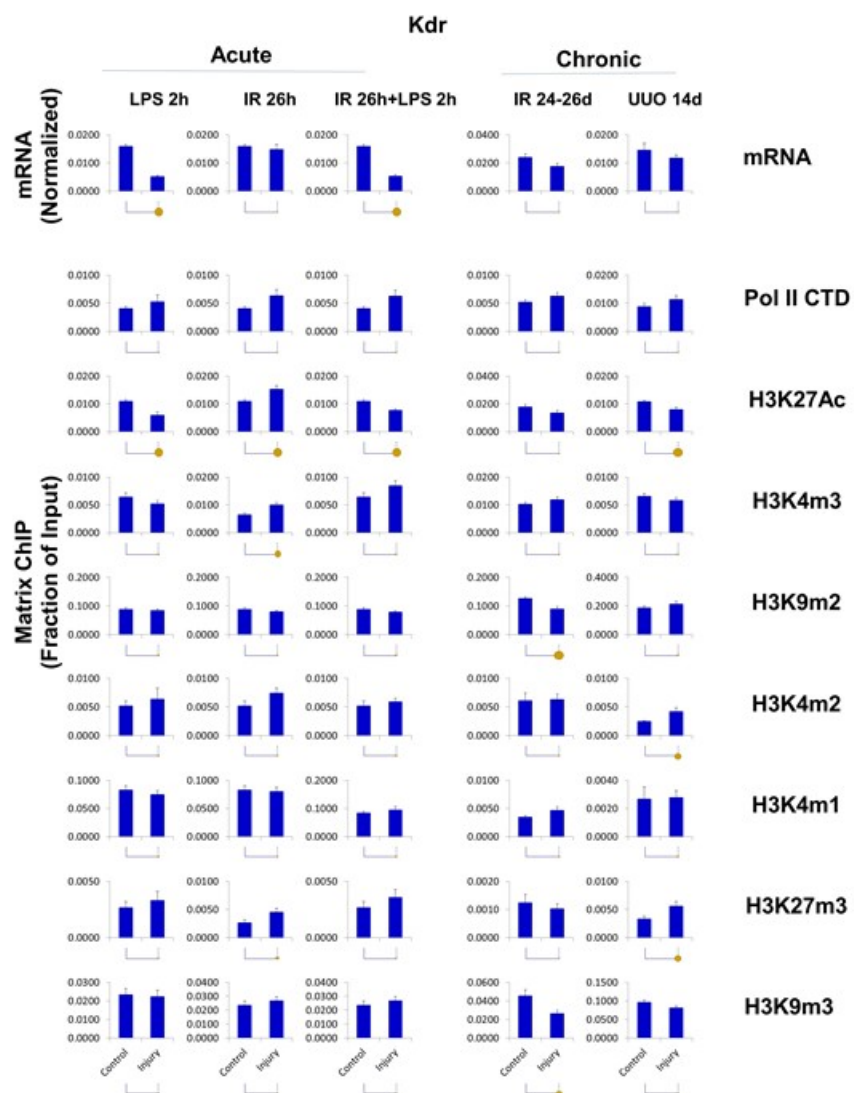

**Fig.S13. Transcriptional and epigenetic analysis of Kdr gene in AKI and CKD models.**

Transcript and ChIP assays and analysis were carried out as in Fig.S2 using primers to Kdr (Tables S1-2). Data represents mean , n=6 mice from each group.

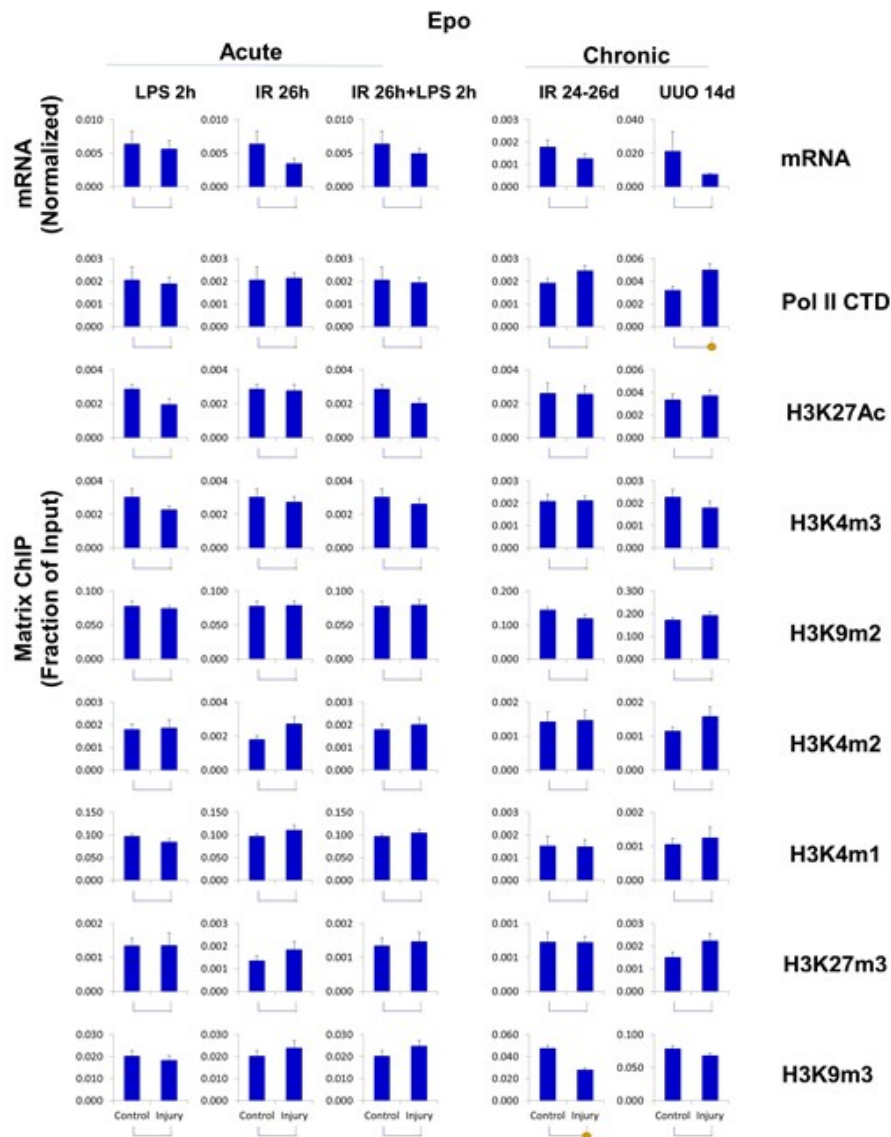

**Fig.S14. Transcriptional and epigenetic analysis of Epo gene in AKI and CKD models.**

Transcript and ChIP assays and analysis were carried out as in Fig.S2 using primers to Epo (Tables S1-2). Data represents mean, n=6 mice from each group.



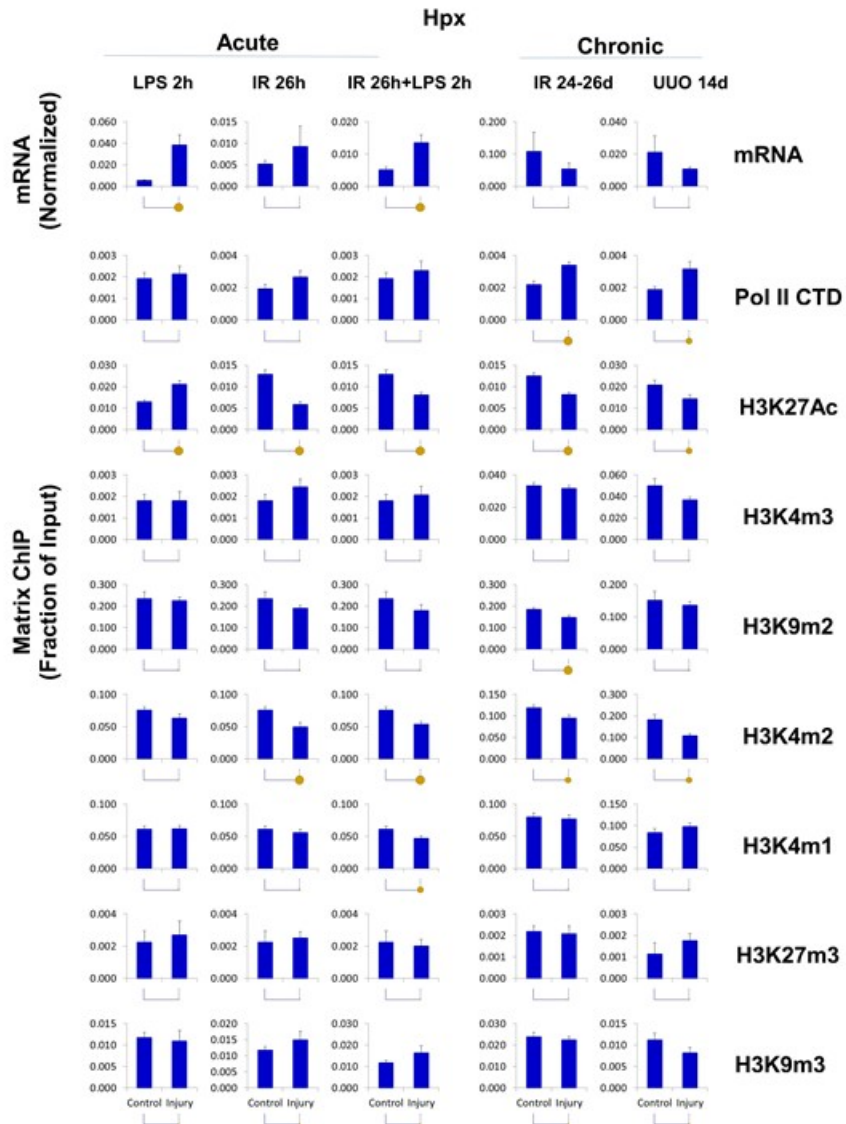

**Fig.S15. Transcriptional and epigenetic analysis of *Hpx* gene in AKI and CKD models.**

Transcript and ChIP assays and analysis were carried out as in Fig.S2 using primers to *Hpx* (Tables S1-2). Data represents mean, n=6 mice from each group.

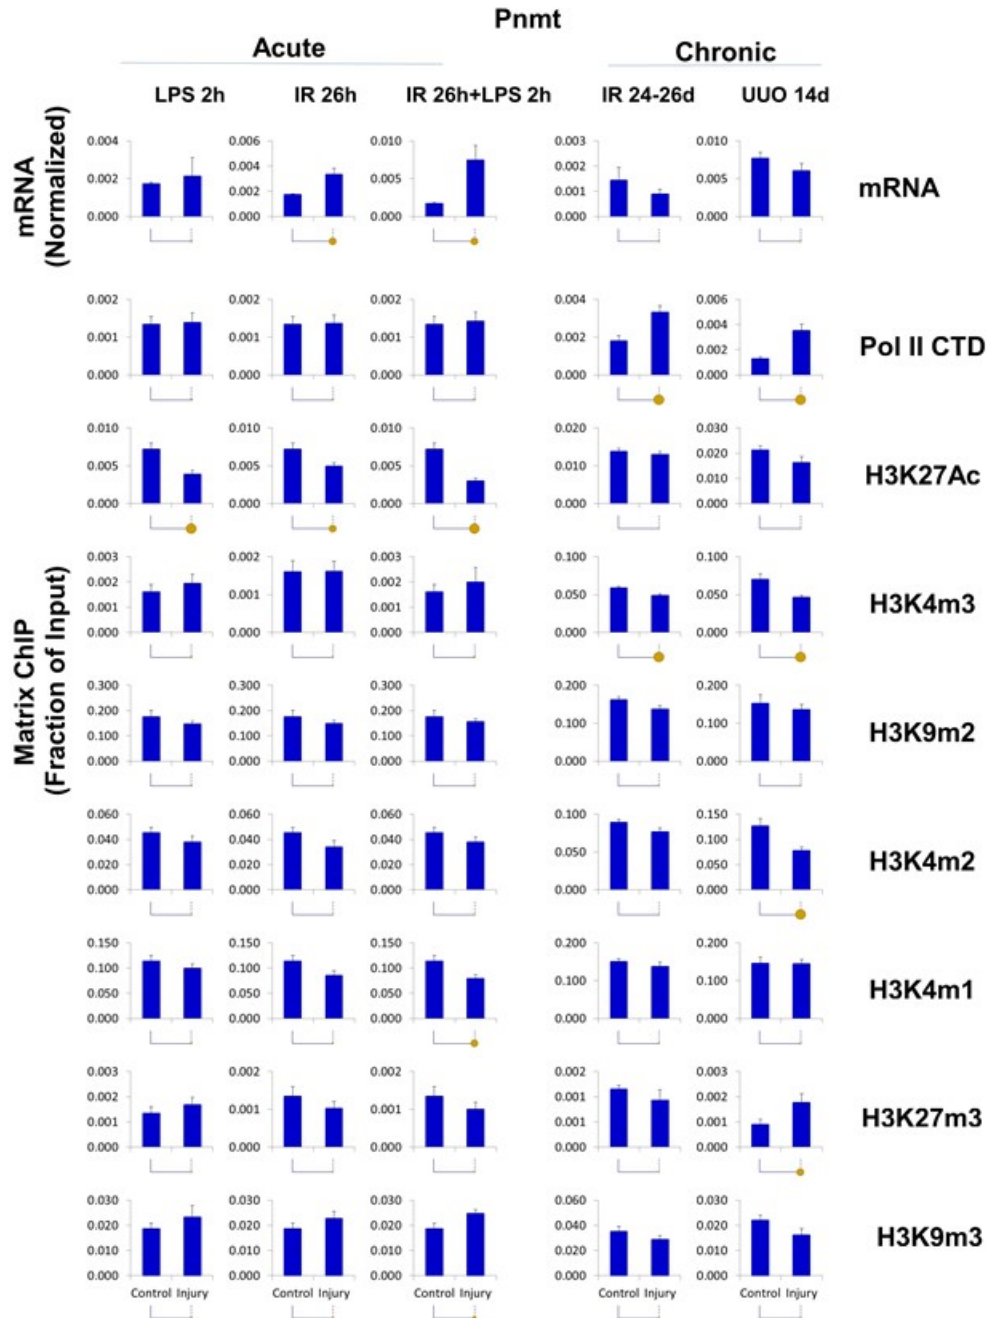

**Fig.S16. Transcriptional and epigenetic analysis of Pnmt gene in AKI and CKD models.**

Transcript and ChIP assays and analysis were carried out as in Fig.S2 using primers to Pnmt (Tables S1-2). Data represents mean , n=6 mice from each group.

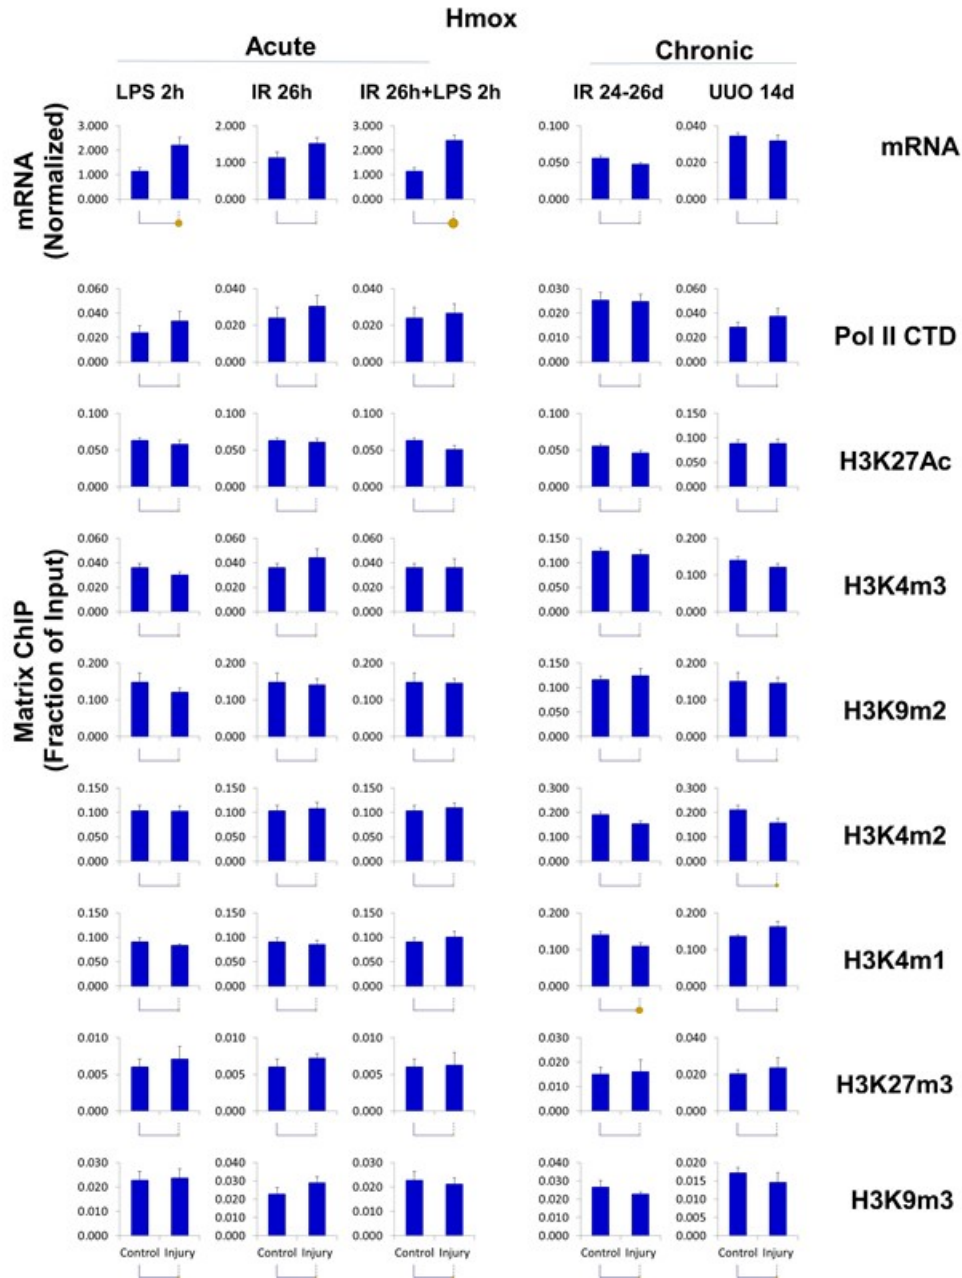

**Fig.S17. Transcriptional and epigenetic analysis of Hmox gene in AKI and CKD models.**

Transcript and ChIP assays and analysis were carried out as in Fig.S2 using primers to Hmox (Tables S1-2). Data represents mean, n=6 mice from each group.

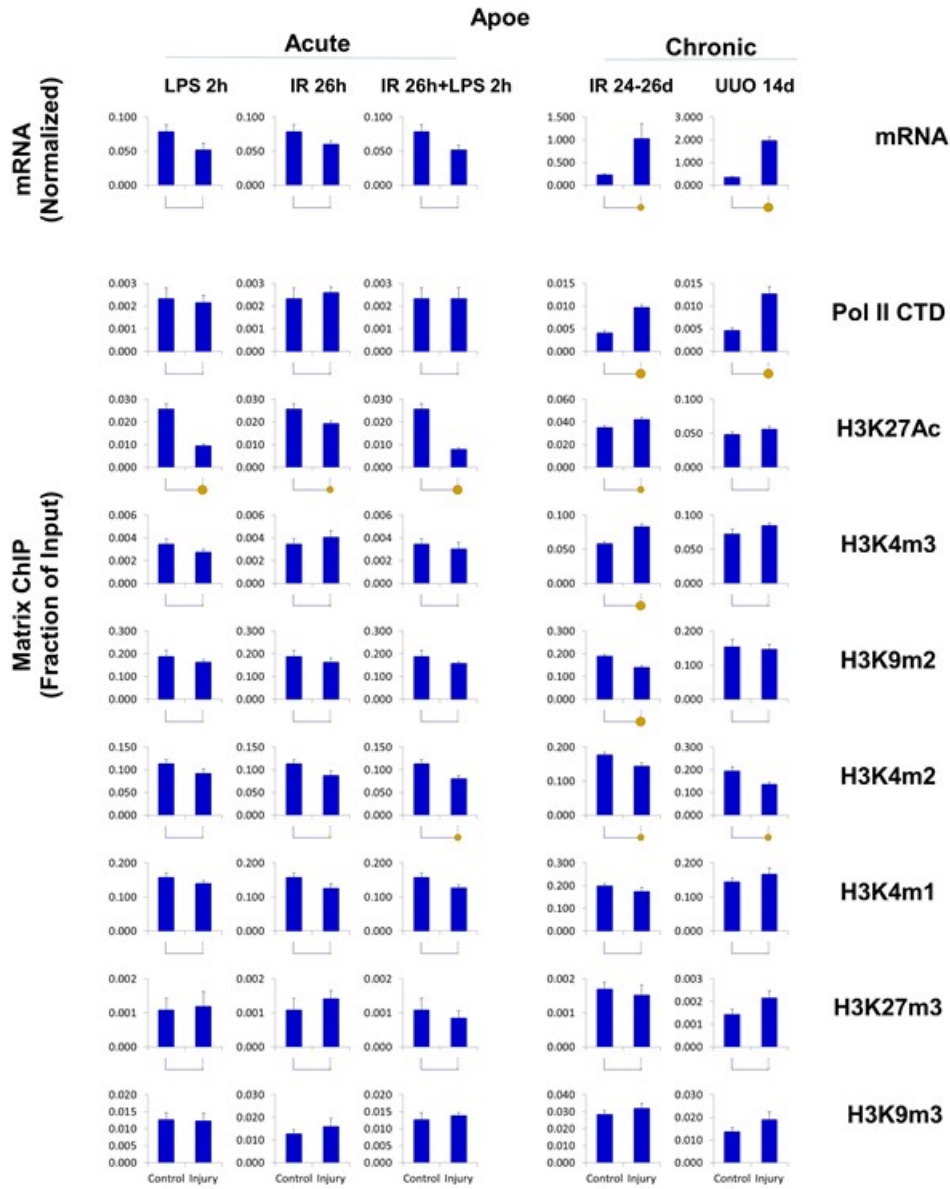

**Fig.S18. Transcriptional and epigenetic analysis of Apoe gene in AKI and CKD models.**

Transcript and ChIP assays and analysis were carried out as in Fig.S2 using primers to Apoe (Tables S1-2). Data represents mean , n=6 mice from each group.

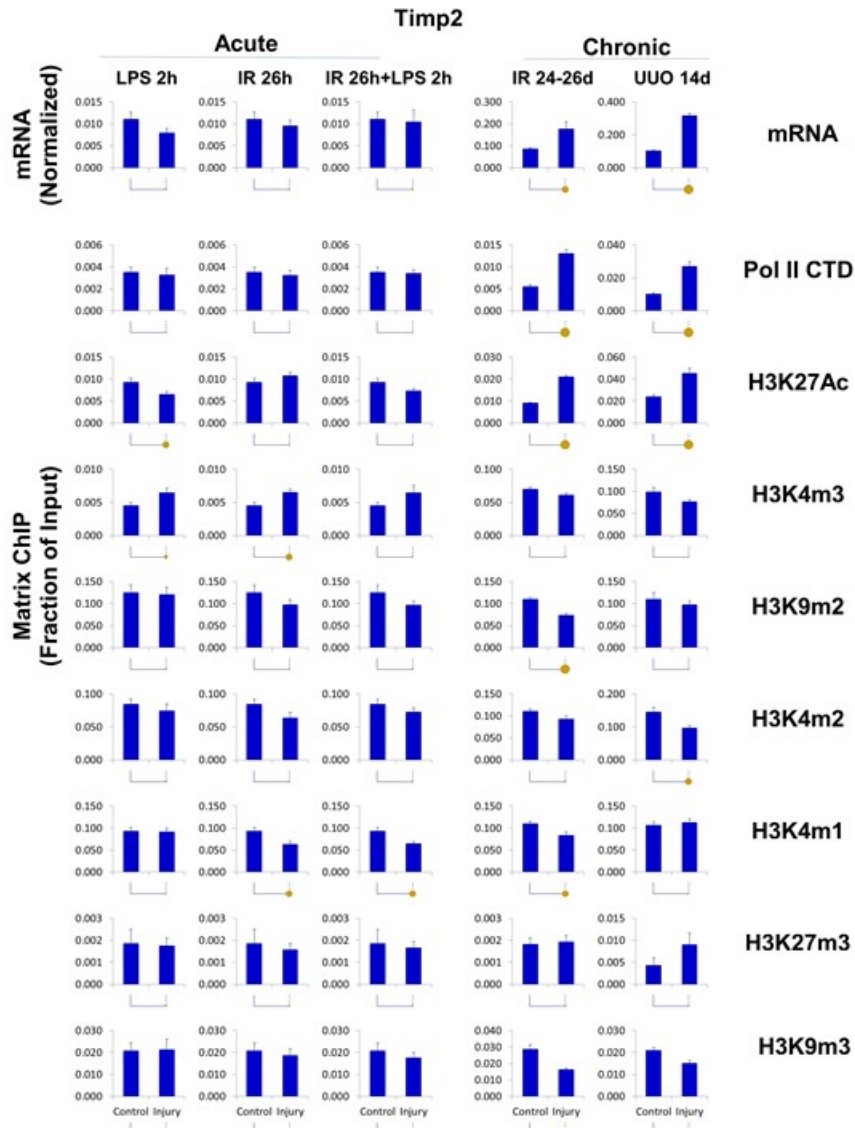

**Fig.S19. Transcriptional and epigenetic analysis of Timp2 gene in AKI and CKD models.**

Transcript and ChIP assays and analysis were carried out as in Fig.S2 using primers to Timp2 (Tables S1-2). Data represents mean , n=6 mice from each group.

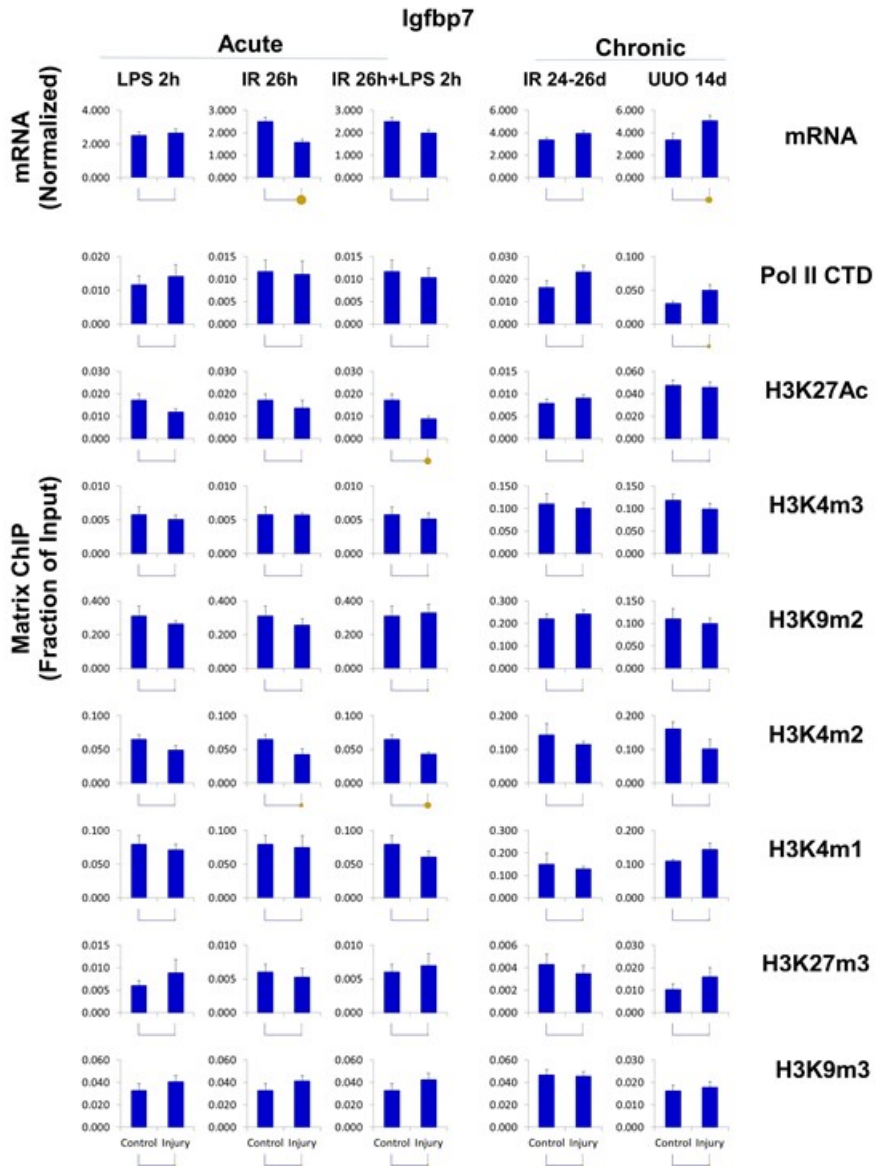

**Fig.S20. Transcriptional and epigenetic analysis of *Igfbp7* gene in AKI and CKD models.**

Transcript and ChIP assays and analysis were carried out as in Fig.S2 using primers to *Igfbp7* (Tables S1-2). Data represents mean , n=6 mice from each group.
